# Supplementary material for: Bio-inspired bimetallic models for electrochemical CO2 reduction
Source: Royal Society of Chemistry journal article supplement (doi:10.1039/d4dt00858h), 2024-01-01
Supplement: d4dt00858h1.pdf [file d4dt00858h1.pdf]

*Supporting Information for*

**Bio-Inspired Bimetallic Models for Electrochemical CO<sub>2</sub>**

**Reduction**

*Weifang Feng,<sup>a</sup> Ying Xiong,<sup>a</sup> Ping Zhang,<sup>a</sup> Minghong Li,<sup>a</sup> Yaping Zhang,<sup>a</sup> Fei Li<sup>\* b</sup>*

*and Lin Chen<sup>\*a</sup>*

[a] State Key Laboratory of Environment-Friendly Energy Material, School of Materials and Chemistry, Southwest University of Science and Technology, Mianyang 621010, P. R. China

[b] State Key Laboratory of Fine Chemicals, Dalian University of Technology, Dalian 116024, P. R. China

**Corresponding Authors**

Email\*: chenlin101101@aliyun.com

Email\*: lifei@dlut.edu.cn

## Contents

|                                                                                            |           |
|--------------------------------------------------------------------------------------------|-----------|
| <b>1. Figure Contents .....</b>                                                            | <b>3</b>  |
| <b>2. Table Contents .....</b>                                                             | <b>10</b> |
| <b>3. Scheme Contents .....</b>                                                            | <b>11</b> |
| <b>4. Materials and Instruments .....</b>                                                  | <b>12</b> |
| <b>5. Crystallographic Structure Determinations .....</b>                                  | <b>13</b> |
| <b>6. Electrochemistry Study Details .....</b>                                             | <b>14</b> |
| <b>7. Fourier-Transform Infrared Reflectance Spectroelectrochemistry (FTIR-SEC) .....</b>  | <b>15</b> |
| <b>8. Experiment section .....</b>                                                         | <b>16</b> |
| <b>9. Detail discussions on the IR-SEC of complexes .....</b>                              | <b>39</b> |
| <b>10. Determination of the equilibrium binding constant of <math>K_{K^+}</math> .....</b> | <b>52</b> |

## 1. Figure Contents

|                                                                                                                                                                                                                                                                                                                                                                                                                                                                                                                                                                                                                                                                                                                                                                                                                                                                                                                                                                                                                                                                                                                                                                                                                           |    |
|---------------------------------------------------------------------------------------------------------------------------------------------------------------------------------------------------------------------------------------------------------------------------------------------------------------------------------------------------------------------------------------------------------------------------------------------------------------------------------------------------------------------------------------------------------------------------------------------------------------------------------------------------------------------------------------------------------------------------------------------------------------------------------------------------------------------------------------------------------------------------------------------------------------------------------------------------------------------------------------------------------------------------------------------------------------------------------------------------------------------------------------------------------------------------------------------------------------------------|----|
| Figure S 1 $^1\text{H}$ NMR (Chloroform, 600 MHz) spectrum of <b>L</b> <sub>1</sub> .....                                                                                                                                                                                                                                                                                                                                                                                                                                                                                                                                                                                                                                                                                                                                                                                                                                                                                                                                                                                                                                                                                                                                 | 18 |
| Figure S 2 $^1\text{H}$ NMR (Chloroform, 600 MHz) spectrum of <b>L</b> <sub>2</sub> .....                                                                                                                                                                                                                                                                                                                                                                                                                                                                                                                                                                                                                                                                                                                                                                                                                                                                                                                                                                                                                                                                                                                                 | 20 |
| Figure S 3 $^1\text{H}$ NMR (Chloroform, 600 MHz) spectrum of <b>L</b> <sub>3</sub> .....                                                                                                                                                                                                                                                                                                                                                                                                                                                                                                                                                                                                                                                                                                                                                                                                                                                                                                                                                                                                                                                                                                                                 | 23 |
| Figure S 4 $^1\text{H}$ NMR (DMSO, 600 MHz) spectrum of <b>L</b> <sub>4</sub> .....                                                                                                                                                                                                                                                                                                                                                                                                                                                                                                                                                                                                                                                                                                                                                                                                                                                                                                                                                                                                                                                                                                                                       | 25 |
| Figure S 5 $^1\text{H}$ NMR (Chloroform, 600 MHz) spectrum of <b>1</b> .....                                                                                                                                                                                                                                                                                                                                                                                                                                                                                                                                                                                                                                                                                                                                                                                                                                                                                                                                                                                                                                                                                                                                              | 27 |
| Figure S 6 high resolution mass spectrum of <b>1</b> .....                                                                                                                                                                                                                                                                                                                                                                                                                                                                                                                                                                                                                                                                                                                                                                                                                                                                                                                                                                                                                                                                                                                                                                | 27 |
| Figure S 7 $^1\text{H}$ NMR (Chloroform, 600 MHz) spectrum of <b>2</b> .....                                                                                                                                                                                                                                                                                                                                                                                                                                                                                                                                                                                                                                                                                                                                                                                                                                                                                                                                                                                                                                                                                                                                              | 29 |
| Figure S 8 high resolution mass spectrum of <b>2</b> .....                                                                                                                                                                                                                                                                                                                                                                                                                                                                                                                                                                                                                                                                                                                                                                                                                                                                                                                                                                                                                                                                                                                                                                | 29 |
| Figure S 9 $^1\text{H}$ NMR (Chloroform, 600 MHz) spectrum of <b>3</b> .....                                                                                                                                                                                                                                                                                                                                                                                                                                                                                                                                                                                                                                                                                                                                                                                                                                                                                                                                                                                                                                                                                                                                              | 31 |
| Figure S 10 high resolution mass spectrum of <b>3</b> .....                                                                                                                                                                                                                                                                                                                                                                                                                                                                                                                                                                                                                                                                                                                                                                                                                                                                                                                                                                                                                                                                                                                                                               | 31 |
| Figure S 11 $^1\text{H}$ NMR (Chloroform, 600 MHz) spectrum of <b>4</b> .....                                                                                                                                                                                                                                                                                                                                                                                                                                                                                                                                                                                                                                                                                                                                                                                                                                                                                                                                                                                                                                                                                                                                             | 33 |
| Figure S 12 high resolution mass spectrum of <b>4</b> .....                                                                                                                                                                                                                                                                                                                                                                                                                                                                                                                                                                                                                                                                                                                                                                                                                                                                                                                                                                                                                                                                                                                                                               | 33 |
| Figure S 13 Experimental FTIR spectra of <b>1-4</b> recorded in KBr displaying characteristic $\nu_{\text{CO}}$ stretching modes for their facial tricarbonyl geometries. ....                                                                                                                                                                                                                                                                                                                                                                                                                                                                                                                                                                                                                                                                                                                                                                                                                                                                                                                                                                                                                                            | 34 |
| Figure S 14 Crystal structure of complex <b>1</b> with ellipsoids at 50% probability.....                                                                                                                                                                                                                                                                                                                                                                                                                                                                                                                                                                                                                                                                                                                                                                                                                                                                                                                                                                                                                                                                                                                                 | 35 |
| Figure S 15 (a) CV and DPV of complex <b>1</b> (0.5 mM) in acetonitrile under Ar. (b) IR-SEC of 3 mM precursor <b>1</b> (black, 2022 1916 and 1897 $\text{cm}^{-1}$ ) under an atmosphere of Ar in MeCN with 25mM $\text{KPF}_6$ and 0.1 M $n\text{Bu}_4\text{NPF}_6$ as the supporting electrolyte, showing two major species as the potential is increased cathodically: <b>(Re<sup>I</sup>(bpy<sup>+</sup>)(CO)<sub>3</sub>)Cl</b> coordination model (red, 1997 1890 and 1861 $\text{cm}^{-1}$ ), the doubly reduced species <b>(Re<sup>0</sup>(bpy<sup>+</sup>)(CO)<sub>3</sub>)</b> (blue, 1946 and 1841 $\text{cm}^{-1}$ ). (c) IR-SEC of 3 mM <b>1</b> at -1.9 V under $\text{CO}_2$ in the presence of 25 mM $\text{KPF}_6$ in acetonitrile with 0.1 M $n\text{Bu}_4\text{NPF}_6$ electrolyte. The resting species (blue, <b>1</b> ) has three $\nu_{\text{CO}}$ stretches at 2023, 1924, and 1897 $\text{cm}^{-1}$ . When the voltage of the cell is held at approximately -1.9 V for more than 1 min, the deposition (red) formed with four $\nu_{\text{CO}}$ stretches at 2000, 1866, 1681 and 1645 $\text{cm}^{-1}$ . (d) CVs of 25 mM $\text{KPF}_6$ under Ar (blue line) and $\text{CO}_2$ (red line)..... | 39 |
| Figure S 16 (a) CV and DPV of complex <b>2</b> (0.5 mM) in acetonitrile under Ar. (b) IR-SEC of 3 mM precursor <b>2</b> (black, 2025 1920 and 1904 $\text{cm}^{-1}$ ) under an atmosphere of Ar in MeCN with 25mM $\text{KPF}_6$ and 0.1 M $n\text{Bu}_4\text{NPF}_6$ as the supporting electrolyte, showing two major species as the potential is increased cathodically: <b>(Re<sup>I</sup>(bpy<sup>+</sup>)(CO)<sub>3</sub>)Cl</b> coordination model (red,                                                                                                                                                                                                                                                                                                                                                                                                                                                                                                                                                                                                                                                                                                                                                            |    |

1997 1902 and 1880  $\text{cm}^{-1}$ ), the doubly reduced species ( $\text{Re}^0(\text{bpy}^{\cdot-})(\text{CO})_3$ ) (blue, 1964 and 1839  $\text{cm}^{-1}$ ). (c) IR-SEC of 3 mM **2** at -1.9 V under  $\text{CO}_2$  in the presence of 25 mM  $\text{KPF}_6$  in acetonitrile with 0.1 M  $n\text{Bu}_4\text{NPF}_6$  electrolyte. The resting species (blue, **2**) has three  $\nu_{\text{CO}}$  stretches at 2026, 1920, and 1904  $\text{cm}^{-1}$ . When the voltage of the cell is held at approximately -1.9 V for more than 1 min, the deposition (red) formed with four  $\nu_{\text{CO}}$  stretches at 2001, 1870, 1682 and 1644  $\text{cm}^{-1}$ .....40

Figure S 17 (a) CV and DPV of complex **3** (0.5 mM) in acetonitrile under Ar. (b) IR-SEC of 3 mM precursor **3** (black, 2022 1917 and 1893  $\text{cm}^{-1}$ ) under an atmosphere of Ar in MeCN with 25mM  $\text{KPF}_6$  and 0.1 M  $n\text{Bu}_4\text{NPF}_6$  as the supporting electrolyte, showing two major species as the potential is increased cathodically: ( $\text{Re}^{\text{I}}(\text{bpy}^{\cdot-})(\text{CO})_3$ )Cl coordination model (red, 2000 1874 and 1866  $\text{cm}^{-1}$ ), the doubly reduced species ( $\text{Re}^0(\text{bpy}^{\cdot-})(\text{CO})_3$ ) (blue, 1944 and 1840  $\text{cm}^{-1}$ ). (c) IR-SEC of 3 mM **3** at -1.9 V under  $\text{CO}_2$  in the presence of 25 mM  $\text{KPF}_6$  in acetonitrile with 0.1 M  $n\text{Bu}_4\text{NPF}_6$  electrolyte. The resting species (blue, **3**) has three  $\nu_{\text{CO}}$  stretches at 2022, 1917, and 1893  $\text{cm}^{-1}$ . When the voltage of the cell is held at approximately -1.9 V for more than 1 min, the deposition (red) formed with four  $\nu_{\text{CO}}$  stretches at 2002, 1866, 1681 and 1647  $\text{cm}^{-1}$ .....41

Figure S 18 (a) CV and DPV of complex **4** (0.5 mM) in acetonitrile under Ar. (b) IR-SEC of 3 mM precursor **4** (black, 2022 1918 and 1893  $\text{cm}^{-1}$ ) under an atmosphere of Ar in MeCN with 25mM  $\text{KPF}_6$  and 0.1 M  $n\text{Bu}_4\text{NPF}_6$  as the supporting electrolyte, showing two major species as the potential is increased cathodically: ( $\text{Re}^{\text{I}}(\text{bpy}^{\cdot-})(\text{CO})_3$ )Cl coordination model (red, 2000 1888 and 1850  $\text{cm}^{-1}$ ), the doubly reduced species ( $\text{Re}^0(\text{bpy}^{\cdot-})(\text{CO})_3$ ) (blue, 1946 and 1844  $\text{cm}^{-1}$ ). (c) IR-SEC of 3 mM **4** at -1.9 V under  $\text{CO}_2$  in the presence of 25 mM  $\text{KPF}_6$  in acetonitrile with 0.1 M  $n\text{Bu}_4\text{NPF}_6$  electrolyte. The resting species (blue, **4**) has three  $\nu_{\text{CO}}$  stretches at 2023, 1920, and 1894  $\text{cm}^{-1}$ . When the voltage of the cell is held at approximately -1.9 V for more than 1 min, the deposition (red) formed with four  $\nu_{\text{CO}}$  stretches at 1990, 1862, 1679 and 1645  $\text{cm}^{-1}$ .....42

Figure S 19 (a) CVs of complex **1** (0.5 mM) with scan rate ( $\nu$ ) varied from 0.025 V/s to 10 V/s under Ar; (b) Plot of redox peak current ( $i_p$ ) vs.  $\nu^{1/2}$  for complex 1. Voltammograms are taken with 0.1 M  $n\text{Bu}_4\text{NPF}_6$  in MeCN solution. Glassy carbon working electrode,  $\text{Ag}^+/\text{Ag}$  reference electrode, and Pt wire counter electrode..... 44

|                                                                                                                                                                                                                                                                                                                                                                                                                                                                                    |    |
|------------------------------------------------------------------------------------------------------------------------------------------------------------------------------------------------------------------------------------------------------------------------------------------------------------------------------------------------------------------------------------------------------------------------------------------------------------------------------------|----|
| Figure S 20 (a) CVs of complex <b>2</b> (0.5 mM) with scan rate ( $\nu$ ) varied from 0.025 V/s to 10 V/s under Ar; (b) Plot of redox peak current ( $i_p$ ) vs. $\nu^{1/2}$ for complex <b>2</b> . Voltammograms are taken with 0.1 M $n\text{Bu}_4\text{NPF}_6$ in MeCN solution. Glassy carbon working electrode, $\text{Ag}^+/\text{Ag}$ reference electrode, and Pt wire counter electrode. ....                                                                              | 45 |
| Figure S 21 (a) CVs of complex <b>3</b> (0.5 mM) with scan rate ( $\nu$ ) varied from 0.025 V/s to 10 V/s under Ar; (b) Plot of redox peak current ( $i_p$ ) vs. $\nu^{1/2}$ for complex <b>3</b> . Voltammograms are taken with 0.1 M $n\text{Bu}_4\text{NPF}_6$ in MeCN solution. Glassy carbon working electrode, $\text{Ag}^+/\text{Ag}$ reference electrode, and Pt wire counter electrode. ....                                                                              | 46 |
| Figure S 22 (a) CVs of complex <b>4</b> (0.5 mM) with scan rate ( $\nu$ ) varied from 0.025 V/s to 10 V/s under Ar; (b) Plot of redox peak current ( $i_p$ ) vs. $\nu^{1/2}$ for complex <b>4</b> . Voltammograms are taken with 0.1 M $n\text{Bu}_4\text{NPF}_6$ in MeCN solution. Glassy carbon working electrode, $\text{Ag}^+/\text{Ag}$ reference electrode, and Pt wire counter electrode. ....                                                                              | 47 |
| Figure S 23 (a) CVs of 0.5 mM <b>1</b> with varied concentrations of $\text{KPF}_6$ under Ar. (b) CVs show 0.5 mM <b>1</b> with varied amounts of $\text{KPF}_6$ under Ar, and saturated with $\text{CO}_2$ in the presence of 25 mM $\text{KPF}_6$ . Voltammograms are taken at a scan rate of 100 mV/s with 0.1 M $n\text{Bu}_4\text{NPF}_6$ in MeCN solution. Glassy carbon working electrode, $\text{Ag}^+/\text{Ag}$ reference electrode, and Pt wire counter electrode. .... | 48 |
| Figure S 24 (a) CVs of 0.5 mM <b>2</b> with varied concentrations of $\text{KPF}_6$ under Ar. (b) CVs show 0.5 mM <b>2</b> with varied amounts of $\text{KPF}_6$ under Ar, and saturated with $\text{CO}_2$ in the presence of 25 mM $\text{KPF}_6$ . Voltammograms are taken at a scan rate of 100 mV/s with 0.1 M $n\text{Bu}_4\text{NPF}_6$ in MeCN solution. Glassy carbon working electrode, $\text{Ag}^+/\text{Ag}$ reference electrode, and Pt wire counter electrode. .... | 49 |
| Figure S 25 (a) CVs of 0.5 mM <b>3</b> with varied concentrations of $\text{KPF}_6$ under Ar. (b) CVs show 0.5 mM <b>3</b> with varied amounts of $\text{KPF}_6$ under Ar, and saturated with $\text{CO}_2$ in the presence of 25 mM $\text{KPF}_6$ . Voltammograms are taken at a scan rate of 100 mV/s with 0.1 M $n\text{Bu}_4\text{NPF}_6$ in MeCN solution. Glassy carbon working electrode, $\text{Ag}^+/\text{Ag}$ reference electrode, and Pt wire counter electrode. .... | 50 |
| Figure S 26 (a) CVs of 0.5 mM <b>4</b> with varied concentrations of $\text{KPF}_6$ under Ar. (b) CVs show 0.5 mM <b>4</b> with varied amounts of $\text{KPF}_6$ under Ar, and saturated with $\text{CO}_2$ in the presence of 25 mM $\text{KPF}_6$ . Voltammograms are taken at a scan rate of 100 mV/s with 0.1 M $n\text{Bu}_4\text{NPF}_6$ in                                                                                                                                  |    |

|                                                                                                                                                                                                                                                                                                                                                                                                                                                                                                                                                                                                                                                                                                    |    |
|----------------------------------------------------------------------------------------------------------------------------------------------------------------------------------------------------------------------------------------------------------------------------------------------------------------------------------------------------------------------------------------------------------------------------------------------------------------------------------------------------------------------------------------------------------------------------------------------------------------------------------------------------------------------------------------------------|----|
| MeCN solution. Glassy carbon working electrode, Ag <sup>+</sup> /Ag reference electrode, and Pt wire counter electrode .....                                                                                                                                                                                                                                                                                                                                                                                                                                                                                                                                                                       | 51 |
| Figure S 27 (a) CVs show 0.5 mM <b>1</b> with varied concentrations of KPF <sub>6</sub> under Ar. (b) CVs show 0.5 mM <b>2</b> with varied concentrations of KPF <sub>6</sub> under Ar. (c) CVs show 0.5 mM <b>3</b> with varied concentrations of KPF <sub>6</sub> under Ar. (d) CVs show 0.5 mM <b>4</b> with varied concentrations of KPF <sub>6</sub> under Ar. (e) Plot of potential difference vs. ln [K <sup>+</sup> ] for complex <b>1-4</b> . Voltammograms are taken at a scan rate of 100 mV/s with 0.1 M <sup>n</sup> Bu <sub>4</sub> NPF <sub>6</sub> in MeCN solution. Glassy carbon working electrode, Ag <sup>+</sup> /Ag reference electrode, and Pt wire counter electrode. .... | 53 |
| Figure S 28 (a) <sup>1</sup> H NMR (DMSO, 600 MHz) spectrum of <b>L</b> <sub>1</sub> (up). (b) <sup>1</sup> H NMR (DMSO, 600 MHz) spectrum of <b>L</b> <sub>1</sub> with K <sup>+</sup> (down).....                                                                                                                                                                                                                                                                                                                                                                                                                                                                                                | 54 |
| Figure S 29 (a) <sup>1</sup> H NMR (DMSO, 600 MHz) spectrum of <b>L</b> <sub>2</sub> (up). (b) <sup>1</sup> H NMR (DMSO, 600 MHz) spectrum of <b>L</b> <sub>2</sub> with K <sup>+</sup> (down).....                                                                                                                                                                                                                                                                                                                                                                                                                                                                                                | 55 |
| Figure S 30 (a) <sup>1</sup> H NMR (DMSO, 600 MHz) spectrum of <b>L</b> <sub>3</sub> (up). (b) <sup>1</sup> H NMR (DMSO, 600 MHz) spectrum of <b>L</b> <sub>3</sub> with K <sup>+</sup> (down).....                                                                                                                                                                                                                                                                                                                                                                                                                                                                                                | 56 |
| Figure S 31(a) <sup>1</sup> H NMR (Chloroform, 600 MHz) spectrum of <b>1</b> (up). (b) <sup>1</sup> H NMR (Chloroform, 600 MHz) spectrum of <b>1</b> with K <sup>+</sup> (down).....                                                                                                                                                                                                                                                                                                                                                                                                                                                                                                               | 57 |
| Figure S 32 (a) <sup>1</sup> H NMR (Chloroform, 600 MHz) spectrum of <b>2</b> (up). (b) <sup>1</sup> H NMR (Chloroform, 600 MHz) spectrum of <b>2</b> with K <sup>+</sup> (down).....                                                                                                                                                                                                                                                                                                                                                                                                                                                                                                              | 58 |
| Figure S 33 (a) <sup>1</sup> H NMR (Chloroform, 600 MHz) spectrum of <b>3</b> (up). (b) <sup>1</sup> H NMR (Chloroform, 600 MHz) spectrum of <b>3</b> with K <sup>+</sup> (down).....                                                                                                                                                                                                                                                                                                                                                                                                                                                                                                              | 59 |
| Figure S 34 (a) CVs show 0.5 mM <b>1</b> with varied amounts of KPF <sub>6</sub> under CO <sub>2</sub> . (b) The dependence of peak point current ( <i>i</i> <sub>cat</sub> ) on the concentration of KPF <sub>6</sub> . Voltammograms are taken at a scan rate of 100 mV/s with 0.1 M <sup>n</sup> Bu <sub>4</sub> NPF <sub>6</sub> in MeCN solution. Glassy carbon working electrode, Ag <sup>+</sup> /Ag reference electrode, and Pt wire counter electrode. ....                                                                                                                                                                                                                               | 60 |
| Figure S 35 (a) CVs show 0.5 mM <b>2</b> with varied amounts of KPF <sub>6</sub> under CO <sub>2</sub> . (b) The dependence of peak point current ( <i>i</i> <sub>cat</sub> ) on the concentration of KPF <sub>6</sub> . Voltammograms are taken at a scan rate of 100 mV/s with 0.1 M <sup>n</sup> Bu <sub>4</sub> NPF <sub>6</sub> in MeCN solution. Glassy carbon working electrode, Ag <sup>+</sup> /Ag reference electrode, and Pt wire counter electrode. ....                                                                                                                                                                                                                               | 61 |
| Figure S 36 (a) CVs show 0.5 mM <b>3</b> with varied amounts of KPF <sub>6</sub> under CO <sub>2</sub> . (b) The dependence of peak point current ( <i>i</i> <sub>cat</sub> ) on the concentration of KPF <sub>6</sub> . Voltammograms are taken at a scan                                                                                                                                                                                                                                                                                                                                                                                                                                         |    |

|                                                                                                                                                                                                                                                                                                                                                                                                                                              |    |
|----------------------------------------------------------------------------------------------------------------------------------------------------------------------------------------------------------------------------------------------------------------------------------------------------------------------------------------------------------------------------------------------------------------------------------------------|----|
| rate of 100 mV/s with 0.1 M $n\text{Bu}_4\text{NPF}_6$ in MeCN solution. Glassy carbon working electrode, $\text{Ag}^+/\text{Ag}$ reference electrode, and Pt wire counter electrode. ....                                                                                                                                                                                                                                                   | 62 |
| Figure S 37 (a) CVs show 0.5 mM <b>4</b> with varied amounts of $\text{KPF}_6$ under $\text{CO}_2$ . (b) The dependence of peak point current( $i_{cat}$ ) on the concentration of $\text{KPF}_6$ . Voltammograms are taken at a scan rate of 100 mV/s with 0.1 M $n\text{Bu}_4\text{NPF}_6$ in MeCN solution. Glassy carbon working electrode, $\text{Ag}^+/\text{Ag}$ reference electrode, and Pt wire counter electrode. ....             | 63 |
| Figure S 38 The first and the second cycle of the CVs of 0.5 mM <b>1-4</b> in the presence of 25 mM $\text{KPF}_6$ under $\text{CO}_2$ (up). (b) the photographs of the electrode after two scan cycles (down). Voltammograms are taken at a scan rate of 100 mV/s with 0.1 M $n\text{Bu}_4\text{NPF}_6$ in MeCN solution. Glassy carbon working electrode, $\text{Ag}^+/\text{Ag}$ reference electrode, and Pt wire counter electrode. .... | 64 |
| Figure S 39 (a) CVs show 0.5 mM <b>1</b> and 25 mM $\text{KPF}_6$ with varied amounts of PhOH under $\text{CO}_2$ . (b) Plot of peak current vs. varied amounts of PhOH for complex <b>1</b> . Voltammograms are taken at a scan rate of 100 mV/s with 0.1 M $n\text{Bu}_4\text{NPF}_6$ in MeCN solution. Glassy carbon working electrode, $\text{Ag}^+/\text{Ag}$ reference electrode, and Pt wire counter electrode. ....                  | 65 |
| Figure S 40 (a) CVs show 0.5 mM <b>2</b> and 25 mM $\text{KPF}_6$ with varied amounts of PhOH under $\text{CO}_2$ . (b) Plot of peak current vs. varied amounts of PhOH for complex <b>2</b> . Voltammograms are taken at a scan rate of 100 mV/s with 0.1 M $n\text{Bu}_4\text{NPF}_6$ in MeCN solution. Glassy carbon working electrode, $\text{Ag}^+/\text{Ag}$ reference electrode, and Pt wire counter electrode. ....                  | 66 |
| Figure S 41 (a) CVs show 0.5 mM <b>3</b> and 25 mM $\text{KPF}_6$ with varied amounts of PhOH under $\text{CO}_2$ . (b) Plot of peak current vs. varied amounts of PhOH for complex <b>3</b> . Voltammograms are taken at a scan rate of 100 mV/s with 0.1 M $n\text{Bu}_4\text{NPF}_6$ in MeCN solution. Glassy carbon working electrode, $\text{Ag}^+/\text{Ag}$ reference electrode, and Pt wire counter electrode. ....                  | 67 |
| Figure S 42 (a) CVs show 0.5 mM <b>1</b> and 25 mM $\text{KPF}_6$ with varied amounts of TFE under $\text{CO}_2$ . (b) Plot of peak current vs. varied amounts of TFE for complex <b>1</b> . Voltammograms are taken at a scan rate of 100 mV/s with 0.1 M $n\text{Bu}_4\text{NPF}_6$ in MeCN solution. Glassy carbon working electrode, $\text{Ag}^+/\text{Ag}$ reference electrode, and Pt wire counter electrode. ....                    | 68 |
| Figure S 43 (a) CVs show 0.5 mM <b>2</b> and 25 mM $\text{KPF}_6$ with varied amounts of TFE under $\text{CO}_2$ . (b) Plot of peak current vs. varied amounts of TFE for complex <b>2</b> . Voltammograms are taken at a scan rate of 100 mV/s with 0.1 M $n\text{Bu}_4\text{NPF}_6$ in MeCN solution. Glassy carbon working electrode, $\text{Ag}^+/\text{Ag}$ reference electrode, and Pt wire counter electrode. ....                    | 69 |

|                                                                                                                                                                                                                                                                                                                                                                                                                                                                        |    |
|------------------------------------------------------------------------------------------------------------------------------------------------------------------------------------------------------------------------------------------------------------------------------------------------------------------------------------------------------------------------------------------------------------------------------------------------------------------------|----|
| Figure S 44 (a) CVs show 0.5 mM <b>3</b> and 25 mM KPF <sub>6</sub> with varied amounts of TFE under CO <sub>2</sub> . (b) Plot of peak current vs. varied amounts of TFE for complex <b>3</b> . Voltammograms are taken at a scan rate of 100 mV/s with 0.1 M <sup>n</sup> Bu <sub>4</sub> NPF <sub>6</sub> in MeCN solution. Glassy carbon working electrode, Ag <sup>+</sup> /Ag reference electrode, and Pt wire counter electrode. ....                           | 70 |
| Figure S 45 (a) CVs show 0.5 mM <b>1</b> and 25 mM KPF <sub>6</sub> with varied amounts of MeOH under CO <sub>2</sub> . (b) Plot of peak current vs. varied amounts of MeOH for complex <b>1</b> . Voltammograms are taken at a scan rate of 100 mV/s with 0.1 M <sup>n</sup> Bu <sub>4</sub> NPF <sub>6</sub> in MeCN solution. Glassy carbon working electrode, Ag <sup>+</sup> /Ag reference electrode, and Pt wire counter electrode. ....                         | 71 |
| Figure S 46 (a) CVs show 0.5 mM <b>2</b> and 25 mM KPF <sub>6</sub> with varied amounts of MeOH under CO <sub>2</sub> . (b) Plot of peak current vs. varied amounts of MeOH for complex <b>2</b> . Voltammograms are taken at a scan rate of 100 mV/s with 0.1 M <sup>n</sup> Bu <sub>4</sub> NPF <sub>6</sub> in MeCN solution. Glassy carbon working electrode, Ag <sup>+</sup> /Ag reference electrode, and Pt wire counter electrode. ....                         | 72 |
| Figure S 47 (a) CVs show 0.5 mM <b>3</b> and 25 mM KPF <sub>6</sub> with varied amounts of MeOH under CO <sub>2</sub> . (b) Plot of peak current vs. varied amounts of MeOH for complex <b>3</b> . Voltammograms are taken at a scan rate of 100 mV/s with 0.1 M <sup>n</sup> Bu <sub>4</sub> NPF <sub>6</sub> in MeCN solution. Glassy carbon working electrode, Ag <sup>+</sup> /Ag reference electrode, and Pt wire counter electrode. ....                         | 73 |
| Figure S 48 (a) CVs show 0.5 mM <b>1</b> and 25 mM KPF <sub>6</sub> with varied amounts of H <sub>2</sub> O under CO <sub>2</sub> . (b) Plot of peak current vs. varied amounts of H <sub>2</sub> O for complex <b>1</b> . Voltammograms are taken at a scan rate of 100 mV/s with 0.1 M <sup>n</sup> Bu <sub>4</sub> NPF <sub>6</sub> in MeCN solution. Glassy carbon working electrode, Ag <sup>+</sup> /Ag reference electrode, and Pt wire counter electrode. .... | 74 |
| Figure S 49 (a) CVs show 0.5 mM <b>2</b> and 25 mM KPF <sub>6</sub> with varied amounts of H <sub>2</sub> O under CO <sub>2</sub> . (b) Plot of peak current vs. varied amounts of H <sub>2</sub> O for complex <b>2</b> . Voltammograms are taken at a scan rate of 100 mV/s with 0.1 M <sup>n</sup> Bu <sub>4</sub> NPF <sub>6</sub> in MeCN solution. Glassy carbon working electrode, Ag <sup>+</sup> /Ag reference electrode, and Pt wire counter electrode. .... | 75 |
| Figure S 50 (a) CVs show 0.5 mM <b>3</b> and 25 mM KPF <sub>6</sub> with varied amounts of H <sub>2</sub> O under CO <sub>2</sub> . (b) Plot of peak current vs. varied amounts of H <sub>2</sub> O for complex <b>3</b> . Voltammograms are taken at a scan rate of 100 mV/s with 0.1 M <sup>n</sup> Bu <sub>4</sub> NPF <sub>6</sub> in MeCN solution. Glassy carbon working electrode, Ag <sup>+</sup> /Ag reference electrode, and Pt wire counter electrode. .... | 76 |
| Figure S 51 IR-SEC of Deposition KHCO <sub>3</sub> and K <sub>2</sub> CO <sub>3</sub> .....                                                                                                                                                                                                                                                                                                                                                                            | 77 |
| Figure S 52 CVs show 0.5 mM <b>1</b> with varied amounts of KPF <sub>6</sub> under CO <sub>2</sub> . Voltammograms are                                                                                                                                                                                                                                                                                                                                                 |    |



taken at a scan rate of 100 mV/s with 0.1 M  $n\text{Bu}_4\text{NPF}_6$  in MeCN : DMF (4 : 1) solution.

Glassy carbon working electrode,  $\text{Ag}^+/\text{Ag}$  reference electrode, and Pt wire counter electrode.78

Figure S 53 CVs show 0.5 mM **2** with varied amounts of  $\text{KPF}_6$  under  $\text{CO}_2$ . Voltammograms are

taken at a scan rate of 100 mV/s with 0.1 M  $n\text{Bu}_4\text{NPF}_6$  in MeCN : DMF (4 : 1) solution.

Glassy carbon working electrode,  $\text{Ag}^+/\text{Ag}$  reference electrode, and Pt wire counter electrode.79

Figure S 54 CVs show 0.5 mM **3** with varied amounts of  $\text{KPF}_6$  under  $\text{CO}_2$ . Voltammograms are

taken at a scan rate of 100 mV/s with 0.1 M  $n\text{Bu}_4\text{NPF}_6$  in MeCN : DMF (4 : 1) solution.

Glassy carbon working electrode,  $\text{Ag}^+/\text{Ag}$  reference electrode, and Pt wire counter electrode.80

Figure S 55 CVs show 0.5 mM **4** with varied amounts of  $\text{KPF}_6$  under  $\text{CO}_2$ . Voltammograms are

taken at a scan rate of 100 mV/s with 0.1 M  $n\text{Bu}_4\text{NPF}_6$  in MeCN : DMF (4 : 1) solution.

Glassy carbon working electrode,  $\text{Ag}^+/\text{Ag}$  reference electrode, and Pt wire counter electrode.81

Figure S 56 (a) Controlled potential electrolysis at -2.25 vs.  $\text{Fc}^{+/0}$  in the presence of 0.5 mM **1-4**

and 25 mM  $\text{KPF}_6$  under  $\text{CO}_2$ . (b) The charge integration after electrolysis for **1-4**.

Voltammograms are taken at a scan rate of 100 mV/s with 0.1 M  $n\text{Bu}_4\text{NPF}_6$  in MeCN : DMF

(4 : 1) solution. Glassy carbon working electrode,  $\text{Ag}^+/\text{Ag}$  reference electrode, and Pt wire

counter electrode. ....82

Figure S 57 (a) CVs show 0.5 mM **1** in the presence of 1 M methanol, upon addition of  $\text{K}^+$  under

Ar. (b) CVs show 0.5 mM **2** in the presence of 1 M methanol, upon addition of  $\text{K}^+$  under Ar.

(c) CVs show 0.5 mM **3** in the presence of 1 M methanol, upon addition of  $\text{K}^+$  under Ar. (d)

CVs show 0.5 mM **4** in the presence of 1 M methanol, upon addition of  $\text{K}^+$  under Ar.

Voltammograms are taken at a scan rate of 100 mV/s with 0.1 M  $n\text{Bu}_4\text{NPF}_6$  in MeCN solution.

Glassy carbon working electrode,  $\text{Ag}^+/\text{Ag}$  reference electrode, and Pt wire counter electrode.83

## 2. Table Contents

|                                                                                                                                                                                                                                                                                                                                                                                                              |    |
|--------------------------------------------------------------------------------------------------------------------------------------------------------------------------------------------------------------------------------------------------------------------------------------------------------------------------------------------------------------------------------------------------------------|----|
| Table S 1 Crystal data and structure refinement for <b>1</b> .....                                                                                                                                                                                                                                                                                                                                           | 35 |
| Table S 2 Bond Lengths for <b>1</b> .....                                                                                                                                                                                                                                                                                                                                                                    | 37 |
| Table S 3 Bond Angles for <b>1</b> .....                                                                                                                                                                                                                                                                                                                                                                     | 38 |
| Table S 4 The absorption peaks for the complexes <b>1-4</b> , and their corresponding mono-reduced species and doubly reduced species in the presence of 25 mM KPF <sub>6</sub> in acetonitrile solution. The data for the absorption peaks were obtained from the IR-SEC test. The control test was taken under the same condition with complex <b>4</b> in the absence of crown and KPF <sub>6</sub> ..... | 43 |
| Table S 5 The equilibrium binding constant of $K_{K^+}$ for complexes <b>1-4</b> .....                                                                                                                                                                                                                                                                                                                       | 53 |
| Table S 6 The products selectivity of <b>1-4</b> in the same condition.....                                                                                                                                                                                                                                                                                                                                  | 82 |

### 3. Scheme Contents

|                                                                     |    |
|---------------------------------------------------------------------|----|
| Scheme S 1 preparation of target ligand <b>L</b> <sub>1</sub> ..... | 16 |
| Scheme S 2 preparation of target ligand <b>L</b> <sub>2</sub> ..... | 19 |
| Scheme S 3 preparation of target ligand <b>L</b> <sub>3</sub> ..... | 21 |
| Scheme S 4 preparation of target ligand <b>L</b> <sub>4</sub> ..... | 24 |
| Scheme S 5 preparation of target complex <b>1</b> .....             | 26 |
| Scheme S 6 preparation of target complex <b>2</b> .....             | 28 |
| Scheme S 7 preparation of target complex <b>3</b> .....             | 30 |
| Scheme S 8 preparation of target complex <b>4</b> .....             | 32 |

#### 4. Materials and Instruments

All manipulations for preparation and handling of organometallic complexes were carried out under Ar. All the solvents were used as received. Other commercially available chemicals such as  $\text{Re}(\text{CO})_5\text{Cl}$ ,  $\text{Pd}(\text{PPh}_3)_4$ , 6-bromo-2,2'-bipyridine, sulfurous dichloride, 1,4,7,10,13-pentaoxa-16-azacyclooctadecane, sodium hydroxide, toluene, potassium carbonate, anhydrous methanol and were purchased from local suppliers and used as received. Water was deionized with the Millipore Milli-Q UF Plus system. Glass carbon disc (3 mm),  $\text{Ag}^+/\text{Ag}$  electrode and platinum wire were purchased from CHI for electrochemical studies.

NMR Spectra were collected with a varian INOVA 600 NMR spectrometer. Mass spectra were recorded with HP 1100 HPL/ESI-DAD-MS and Waters/Micromass LC/Q-TOF-MS instruments. Elemental analyses were performed with a Thermoquest-Flash EA 1112 elemental analyzer.

## 5. Crystallographic Structure Determinations

The single-crystal X-ray diffraction data were collected with an Bruker Smart Apex II CCD diffractometer with a graphite-monochromated Mo-K radiation ( $\lambda = 0.071073 \text{ \AA}$ ) at 296 K using the  $\theta$ -2 scan mode. Data processing was accomplished with the SAINT processing program. Intensity data were corrected for absorption by the SADABS program. All structures were solved by direct methods and refined on  $F^2$  against full-matrix least-squares methods by using the SHELXTL 97 program package. All non-hydrogen atoms were refined anisotropically. Hydrogen atoms were located by geometrical calculation. Crystallographic data and selected bond lengths and angles for **1** are given in Table S1-S3. **CCDC-2289719** contain the supplementary crystallographic data for this paper. These data can be obtained free of charge from The Cambridge Crystallographic Data Centre via [www.ccdc.cam.ac.uk/data\\_request/cif](http://www.ccdc.cam.ac.uk/data_request/cif).

## 6. Electrochemistry Study Details

**Cyclic voltammetry (CV):** Cyclic voltammetry experiments were carried out in a three-electrode cell under high-purity Ar (99.999%) or CO<sub>2</sub> (99.99%) using CHI 760E potentiostat. The working electrode was a glassy carbon disc (diameter 3 mm) polished with 0.5- $\mu$ m diamond pastes, then sonicated in ion-free water for 15 min and washed with MeCN prior to use. The reference electrode was a Ag<sup>+</sup>/Ag (0.01 M AgNO<sub>3</sub>) electrode and the counter electrode was platinum wire. Rhenium complex concentrations were generally at 0.5 mM. A solution of 0.1 M <sup>n</sup>Bu<sub>4</sub>NPF<sub>6</sub> (Fluka, electrochemical grade) in CH<sub>3</sub>CN was used as supporting electrolyte, which was degassed by bubbling with dry Ar or CO<sub>2</sub> for 5 min before measurement. The catalytic experiments with CO<sub>2</sub> were performed in CO<sub>2</sub>-saturated CH<sub>3</sub>CN solution (about 0.28 M) with addition of a certain amount of KPF<sub>6</sub>. The scan rate is 100 mV/s. Ferrocene (Fc) was added as an internal reference in the end of each measurement to convert the measured potentials and *all potentials given in this work are referred to Fc<sup>+0</sup>*.

## **7. Fourier-Transform Infrared Reflectance Spectroelectrochemistry (FTIR-SEC)**

A homemade FTIR-SEC instrument was used for this study. The cell consists of a glass carbon working electrode (10 mm), a Pt counter (15 mm × 30 mm) electrode, and a Ag/AgNO<sub>3</sub> reference electrode and a CaF<sub>2</sub> plate as the optical window. The IR beam is directed to focus on the working electrode through the optical window, where it is reflected and ultimately directed to the Bruker Vertex 80 detector. The dry CH<sub>3</sub>CN solution (0.1 M TBAP) prepared under an atmosphere of Ar is used as the electrolyte.

## 8. Experiment section

### General procedure for the preparation of the target ligands involved in this article.

The procedure was slightly modified according to the literature (Shuanglin He et. al. *Angew. Chem. Int. Ed.* **2023**, e202216082). An oven-dried Schlenk flask equipped with a stir bar was evacuated, back-filled with Ar, and charged with 1 equiv bromo-precursors, 1.1 equiv corresponding phenylboric acid, 0.05 equiv Pd(PPh<sub>3</sub>)<sub>4</sub>, toluene (50 mL), ethanol (50 mL) and an aqueous 2 M solution of potassium carbonate (12 mL). The solution was stirred at room temperature for 15 min before heated to 92 °C for 42 h, the mixture was cooled to room temperature and 30% hydrogen peroxide (0.4 mL) was added. The mixture was stirred at room temperature for 30 min, the product was extracted using diethyl ether (2 × 100 mL), and the extract was washed with saturated sodium chloride solution (1 × 30 mL) and water (3 × 30 mL) to give a red organic layer. Following drying with magnesium sulfate, the volatiles were removed under reduced pressure to give an orange-brown residue. The residues of ligand were removed using a short silica gel column employing dichloromethane as eluting solvent. After the solvent was removed under reduced pressure, the product was obtained as a solid.

### Synthesis of ligand L<sub>1</sub>

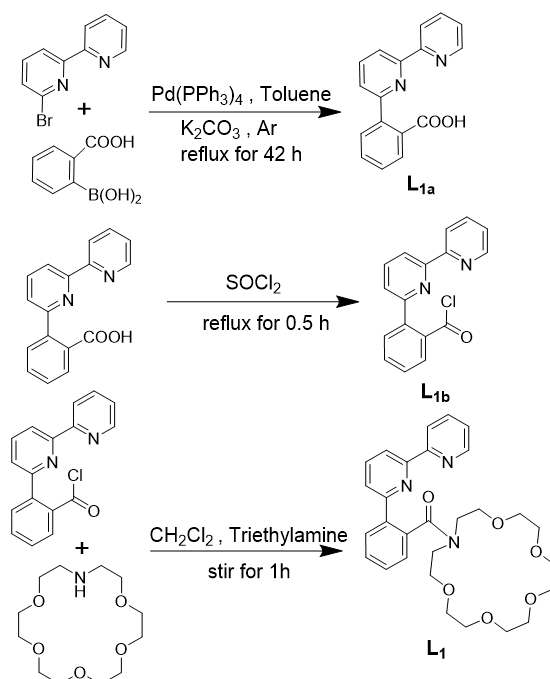

Scheme S 1 preparation of target ligand L<sub>1</sub>.



The 2-([2,2'-bipyridin]-6-yl)benzoic acid (**L<sub>1a</sub>**) was obtained according to literature procedures (Shuanglin He et. al. *Angew. Chem. Int. Ed.* **2023**, e202216082). The reaction is monitored by TLC ( $R_f$  = 0.3, MeOH : DCM = 1 : 9).

2-([2,2'-bipyridin]-6-yl)benzoyl chloride (**L<sub>1b</sub>**) was prepared by stirring a mixture of **L<sub>1a</sub>** (1.90 g, 6.88 mmol) and thionyl chloride (10.00 mL) mixing for 0.5 h. After the reaction, the volatiles were removed under reduced pressure to give the **L<sub>1b</sub>**. the dichloromethane solution of 1,4,7,10,13-pentaoxa-16-azacyclooctadecane (2.20 g, 8.32 mmol) was added to **L<sub>1b</sub>**, and triethylamine (1.00 mL) was slowly added. The mixture was stirred at room temperature for 1 h. Quenched reaction with water and collected organic layer of the product. Finally, the product was purified by silica gel column chromatography (dichloromethane) to obtain the target ligand **L<sub>1</sub>** (1.60 g, 3.07 mmol, 44.62% yield) and the reaction is monitored by TLC ( $R_f$  = 0.5, MeOH : DCM = 1 : 9). <sup>1</sup>H NMR (600 MHz, DMSO)  $\delta$  8.70-8.65 (1H, d), 8.56 (1H, d), 8.41 (1H, d), 7.90-7.82 (2H, m), 7.77 (1H, d), 7.67 (1H, d), 7.50 (1H t), 7.46 (1H, t), 7.43 (1H, d), 7.33-7.29 (1H, t), 3.66 (2H, m), 3.60-3.29 (20H, m), 3.23 (2H, m). ESI-MS: Calcd for [M + H]<sup>+</sup>: m/z 522.25; found: 522.22.

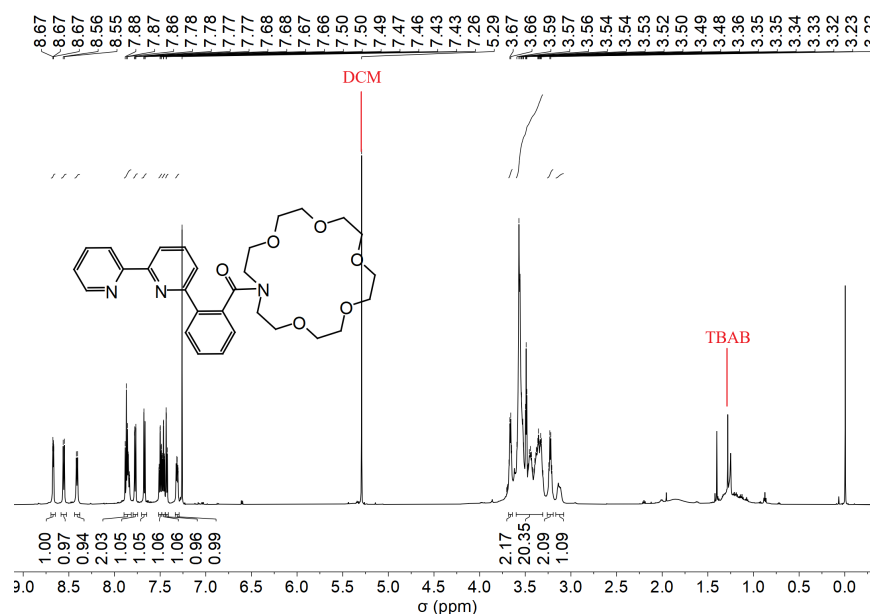

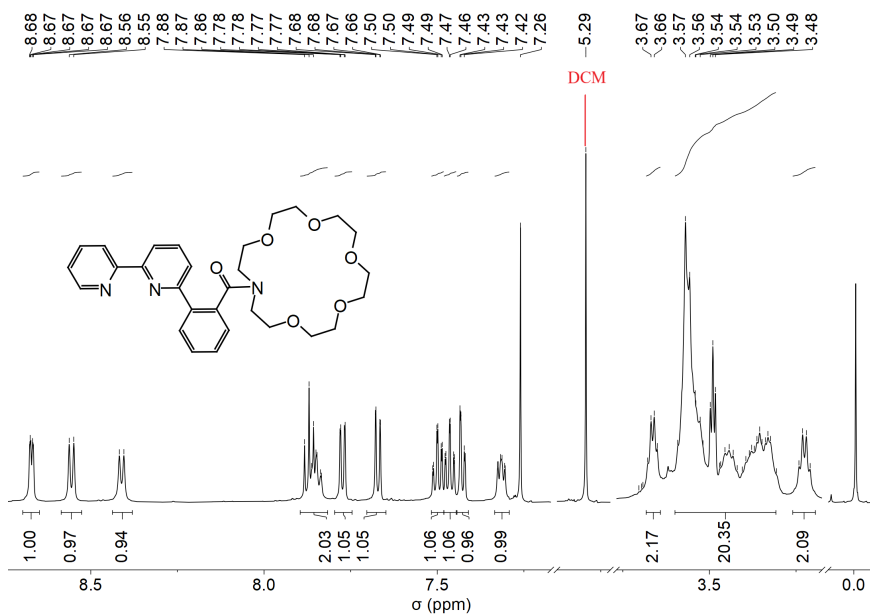

Figure S 1  $^1\text{H}$  NMR (Chloroform, 600 MHz) spectrum of **L1**.

## Synthesis of ligand **L**<sub>2</sub>

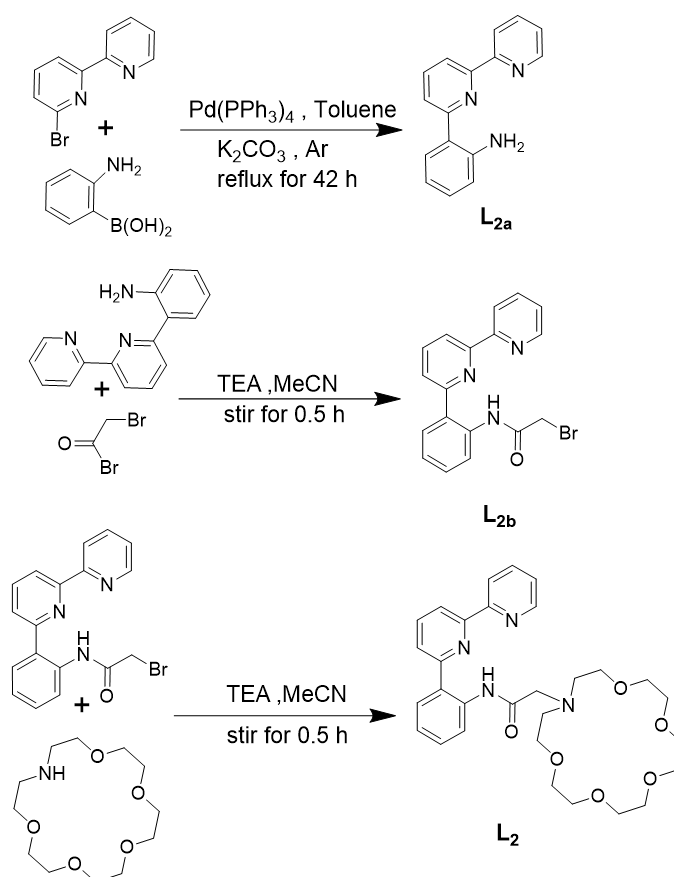

Scheme S 2 preparation of target ligand **L**<sub>2</sub>.

2-([2,2'-bipyridin]-6-yl)aniline (**L**<sub>2a</sub>) was obtained according to literature procedures (Shuanglin He et. al. *Angew. Chem. Int. Ed.* **2023**, e202216082). The reaction is Monitored by TLC ( $R_f = 0.4$ , MeOH : DCM = 1 : 9).

N-(2-([2,2'-bipyridin]-6-yl)phenyl)-2-bromoacetamide (**L**<sub>2b</sub>) was prepared by stirring an acetonitrile solution of a mixture of **L**<sub>2a</sub> (1.00 g, 4.05 mmol) and 2-bromoacetyl bromide (4.05 mmol) for 0.5 h, and triethylamine (1.00 mL) was slowly added. After the reaction, 1,4,7,10,13-pentaoxa-16-azacyclooctadecane (1.30 g, 4.92 mmol) was added to **L**<sub>2b</sub>, and triethylamine (1.00 mL) was slowly added. The mixture was stirred at room temperature for 1 h. Quenched reaction with water and collected organic layer of the product. Finally, the product was purified by silica gel column chromatography (dichloromethane) to obtain the target ligand **L**<sub>2</sub> (0.90 g, 1.64 mmol, 40.49% yield) and the reaction is Monitored by TLC ( $R_f = 0.4$ , MeOH : DCM = 1 : 9). : <sup>1</sup>H NMR (600 MHz, Chloroform)  $\delta$  11.01 (1H, s), 8.73 (1H, d), 8.50 (1H, d), 8.42 (2H,

d), 7.98 (1H, t), 7.85 (1H, t), 7.56 (2H, t), 7.46 (1H, t), 7.36 (1H, d), 7.24 (1H, t), 3.85-3.27 (20H, m), 3.20 (2H, d), 2.45 (4H, t) ESI-MS: Calcd for  $[M + H]^+$ : m/z 551.28; found: 551.22.

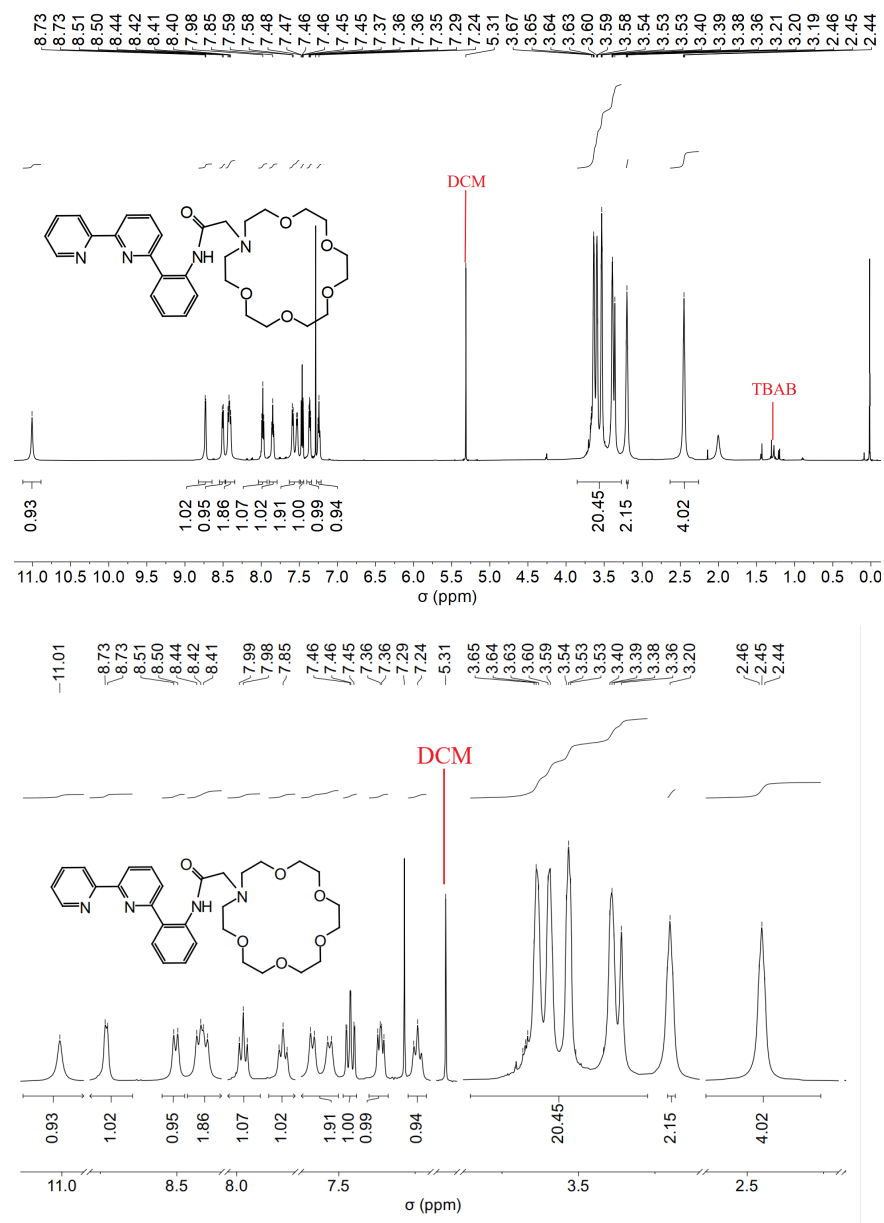

Figure S 2  $^1\text{H}$  NMR (Chloroform, 600 MHz) spectrum of  $L_2$ .

## Synthesis of ligand **L**<sub>3</sub>

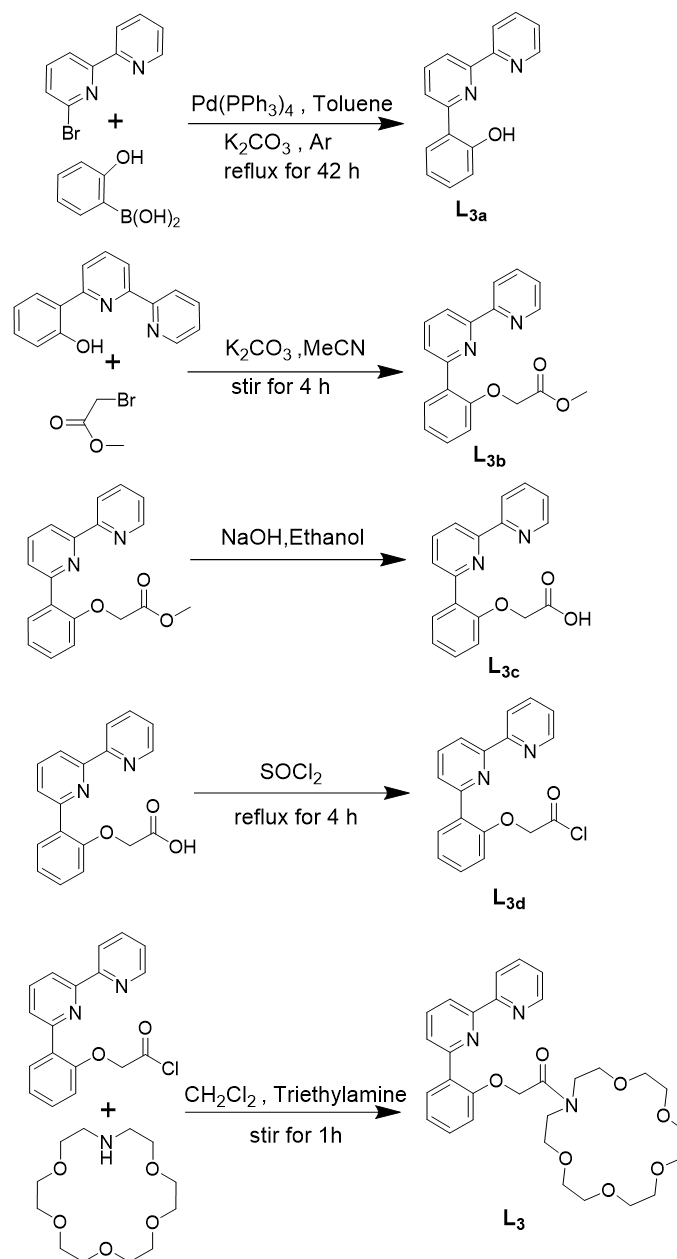

Scheme S 3 preparation of target ligand **L**<sub>3</sub>.

2-([2,2'-bipyridin]-6-yl)phenol (**L**<sub>3a</sub>) was obtained according to literature procedures (Shuanglin He et. al. *Angew. Chem. Int. Ed.* **2023**, e202216082). The reaction is monitored by TLC ( $R_f = 0.4$ , MeOH : DCM = 1 : 4).

Methyl bromoacetate (4.43 mmol) and potassium carbonate (0.70 g, 5.06 mmol) were added to the acetonitrile (5.00 mL) solution of **L**<sub>3a</sub> (1.10 g, 4.43 mmol), respectively, and stirred for 4h to obtain methyl 2-(2-([2,2'-bipyridin]-6-yl)phenoxy)acetate (**L**<sub>3b</sub>). Subsequently,

2-(2-([2,2'-bipyridin]-6-yl)phenoxy)acetic acid (**L<sub>3c</sub>**, 0.79 g, 2.58 mmol, 58.23% yield). was obtained by hydrolysis of **L<sub>3b</sub>** and the reaction is monitored by TLC ( $R_f = 0.6$ , MeOH : DCM = 1 : 9). 2-(2-([2,2'-bipyridin]-6-yl)phenoxy)acetyl chloride (**L<sub>3a</sub>**) was prepared by stirring a mixture of **L<sub>3c</sub>** and thionyl chloride (10.00 mL) mixing for 0.5 h. After the reaction, the volatiles were removed under reduced pressure to give the **L<sub>3a</sub>** the dichloromethane solution of 1,4,7,10,13-pentaoxa-16-azacyclooctadecane (0.80 g, 3.03 mmol) was added to **L<sub>3a</sub>**, and triethylamine (1.00 mL) was slowly added. The mixture was stirred at room temperature for 1 h. Quenched reaction with water and collected organic layer of the product. Finally, the product was purified by silica gel column chromatography (dichloromethane) to obtain the target ligand **L<sub>3</sub>** (0.60 g, 1.09 mmol, 42.25% yield) and the reaction is Monitored by TLC ( $R_f = 0.5$ , MeOH : DCM = 1 : 9): <sup>1</sup>H NMR (600 MHz, Chloroform)  $\delta$  8.69 (1H, d), 8.58 (1H, d), 8.35 (1H, d), 8.15 (1H, d), 8.02 (1H, d), 7.88-7.81 (2H, m), 7.38-7.34 (1H, m), 7.33-7.30 (1H, m), 7.14 (1H, t), 7.04 (1H, d), 4.90 (2H, s), 3.68-3.65 (4H, m), 3.64-3.59 (16H, m), 3.57-3.54 (4H, m). ESI-MS: Calcd for [M + H]<sup>+</sup>: m/z 552.26; found: 552.24.

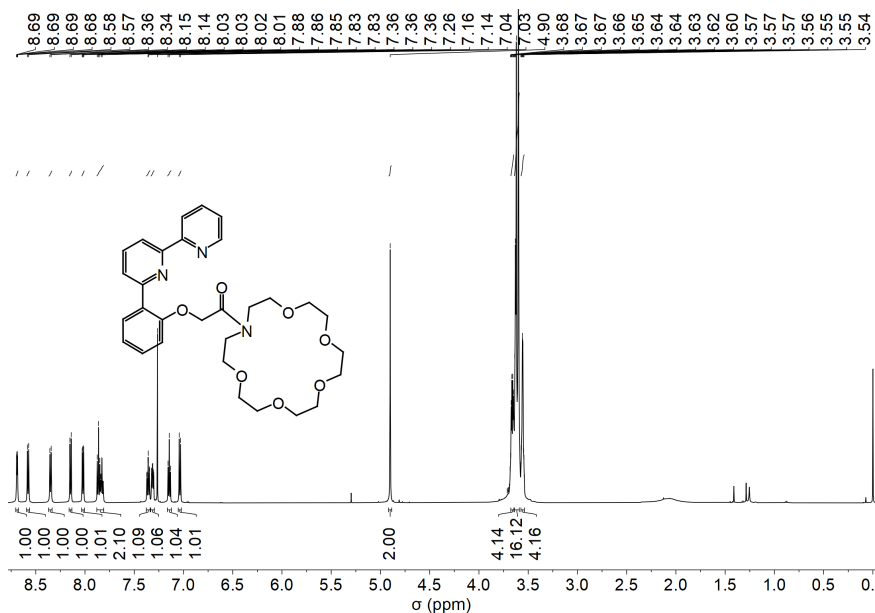

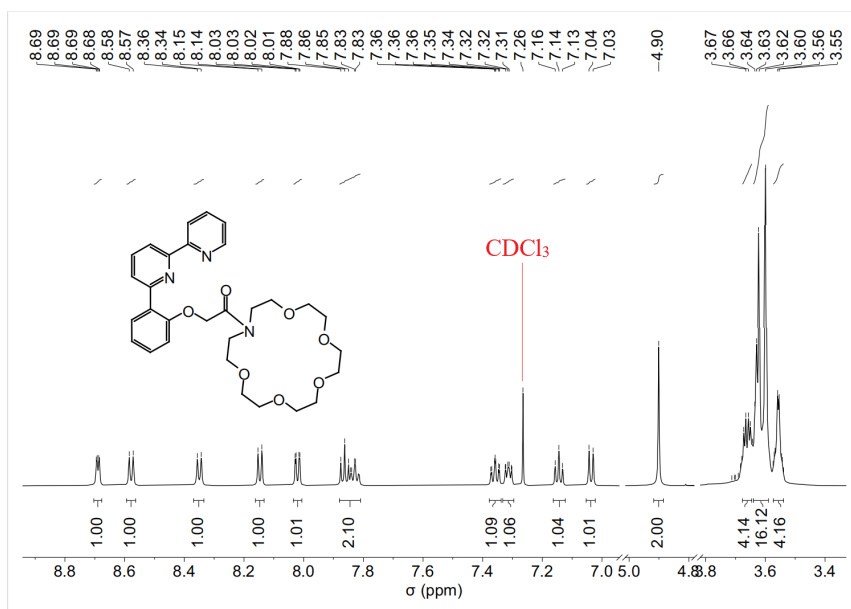

Figure S 3  $^1\text{H}$  NMR (Chloroform, 600 MHz) spectrum of  $\text{L}_3$ .

## Synthesis of ligand L<sub>4</sub>

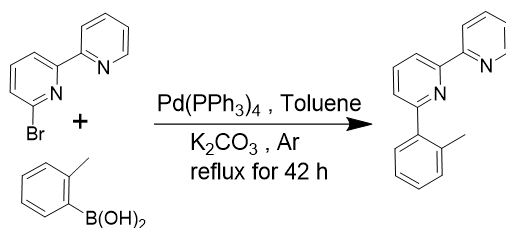

Scheme S 4 preparation of target ligand L<sub>4</sub>.

6-(o-tolyl)-2,2'-bipyridine was obtained according to literature procedures (Shuanglin He et. al. *Angew. Chem. Int. Ed.* **2023**, e202216082). The reaction is Monitored by TLC ( $R_f = 0.5$ , MeOH : DCM = 1 : 9): <sup>1</sup>H NMR (600 MHz, Chloroform)  $\delta$  8.70 (1H, d), 8.51 (1H, d), 8.40 (1H, d), 7.89 (1H, s), 7.81 (1H, s), 7.47 (2H, d), 7.36-7.18 (4H, m), 2.48 (3H, s). ESI-MS: Calcd for [M + H]<sup>+</sup>: m/z 247.12; found: 247.14.

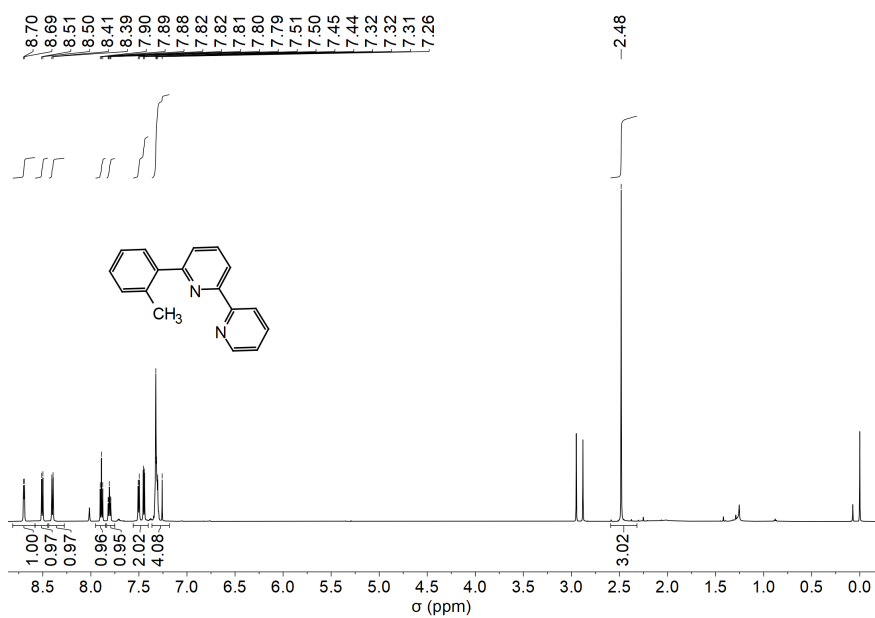



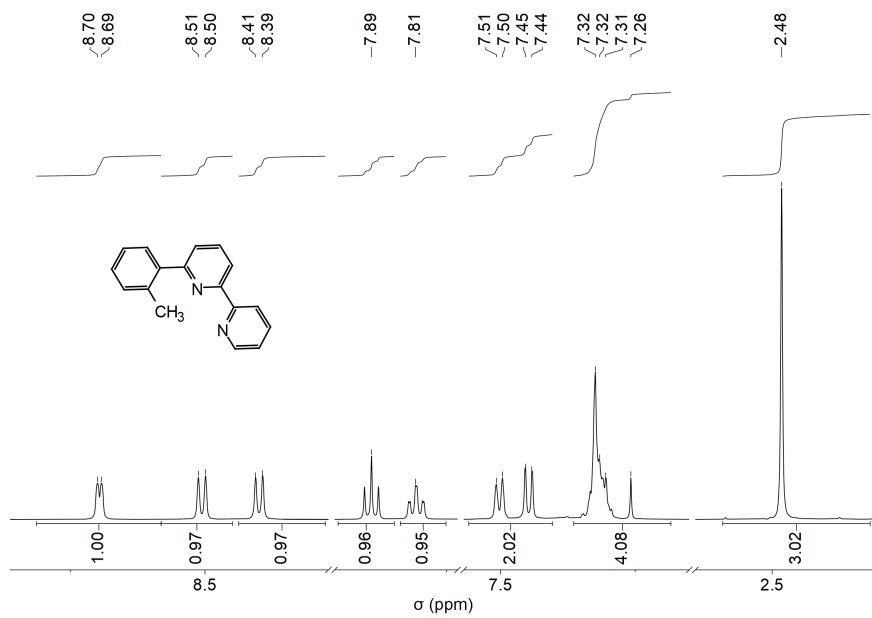

Figure S 4 <sup>1</sup>H NMR (DMSO, 600 MHz) spectrum of L<sub>4</sub>.

## Synthesis of complexes 1

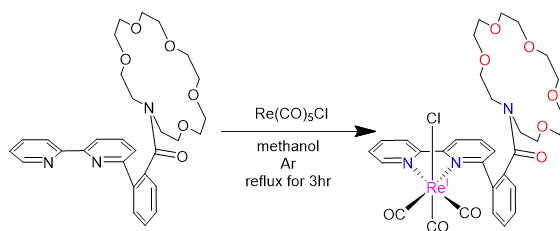

Scheme S 5 preparation of target complex **1**.

**Preparation of complexes 1.** Compound  $\text{Re}(\text{CO})_5\text{Cl}$  (0.13 g, 0.36 mmol) was added to a degassed methanol solution (2.00 mL) of 1 equiv **L**<sub>1</sub>. The resulting colorless solution was heated to reflux for 3 h under argon, then allowed to cool to room temperature before filtration. The filtrate was collected and concentrated, then washed with  $\text{Et}_2\text{O}$  and dried in vacuo to afford yellow product (0.25 g, 0.30 mmol, 83.33% yield). The following were observed for the mixture of atropisomers:  $^1\text{H NMR}$  (600 MHz, Chloroform)  $\delta$  9.10 (1H, d), 8.28-7.83 (6H, m), 7.72-7.50 (4H, m), 4.03-3.29 (24H, m); IR (KBr, Figure S 13)  $\nu_{\text{CO}}$ : 2021 (s), 1917 (s), 1892 (s)  $\text{cm}^{-1}$ ; Anal. Calcd for **1**,  $\text{C}_{32}\text{H}_{35}\text{ClN}_3\text{O}_9\text{Re}$ : C, 46.46; H, 4.26; N, 5.08; found: C, 46.44; H, 4.22; N, 5.04; MS (TOF-ES):  $m/z = 792.1920$   $[\text{M} - \text{Cl}]^+$ ,  $m/z = 850.1500$   $[\text{M} + \text{Na}]^+$ .

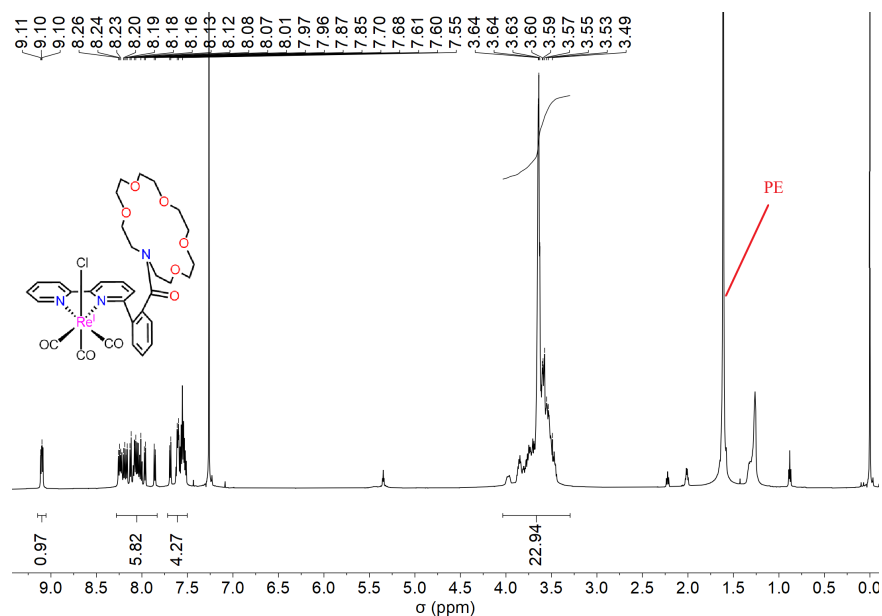

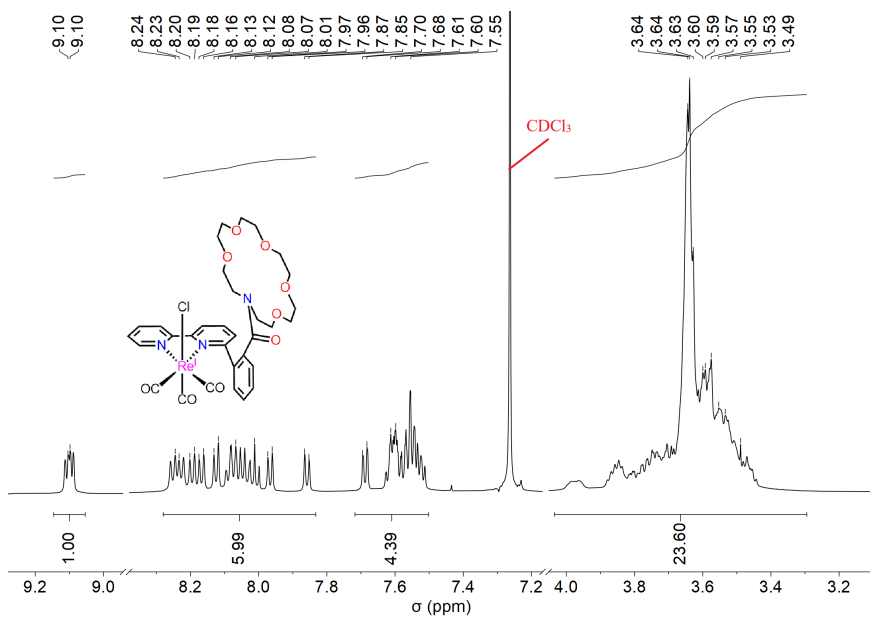

Figure S 5  $^1\text{H}$  NMR (Chloroform, 600 MHz) spectrum of **1**.

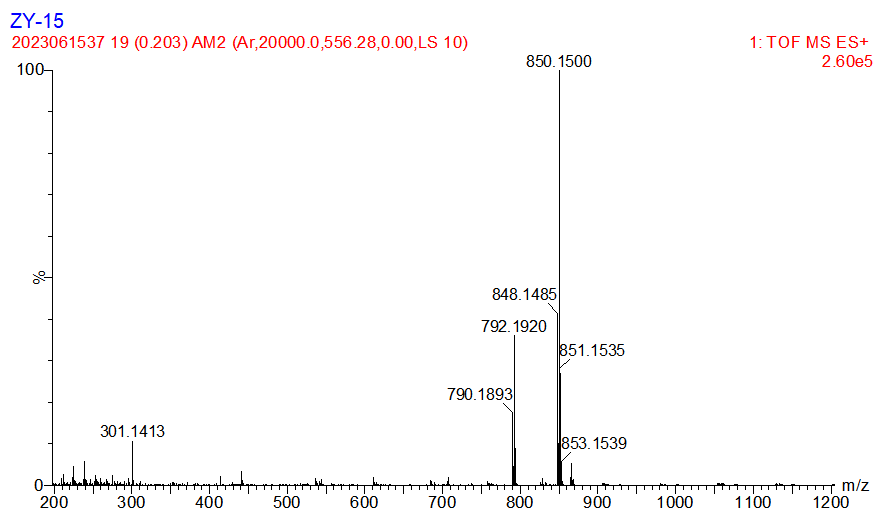

Figure S 6 high resolution mass spectrum of **1**.

## Synthesis of complexes **2**

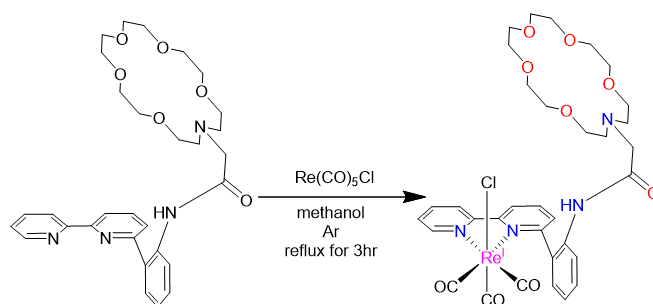

Scheme S 6 preparation of target complex **2**.

**Preparation of complexes **2**.** Compound  $\text{Re}(\text{CO})_5\text{Cl}$  (0.10 g, 0.29 mmol) was added to a degassed methanol solution (2.00 mL) of 1 equiv **L**<sub>2</sub>. The resulting colorless solution was heated to reflux for 3 h under argon, then allowed to cool to room temperature before filtration. The filtrate was collected and concentrated, then washed with  $\text{Et}_2\text{O}$  and dried in vacuo to afford yellow product (0.20 g, 0.23 mmol, 79.31% yield). The following were observed for the mixture of atropisomers:  $^1\text{H}$  NMR (600 MHz, Chloroform)  $\delta$  9.99 (1H, s), 9.31-8.98 (2H, m), 8.44-8.06 (4H, m), 7.68-7.28 (5H, m), 4.44-2.98 (24H, m), 2.64 (2H, d); IR (KBr, Figure S 13)  $\nu_{\text{CO}}$ : 2025 (s), 1920 (s), 1904 (s)  $\text{cm}^{-1}$ ; Anal. Calcd for **2**,  $\text{C}_{33}\text{H}_{38}\text{ClN}_4\text{O}_9\text{Re}$ : C, 46.29; H, 4.47; N, 6.54; found: C, 46.28; H, 4.46; N, 6.53; MS (TOF-ES):  $m/z = 821.2189$   $[\text{M} - \text{Cl}]^+$ ,  $m/z = 857.1956$   $[\text{M} + \text{H}]^+$ ,  $m/z = 879.1772$   $[\text{M} + \text{Na}]^+$ .

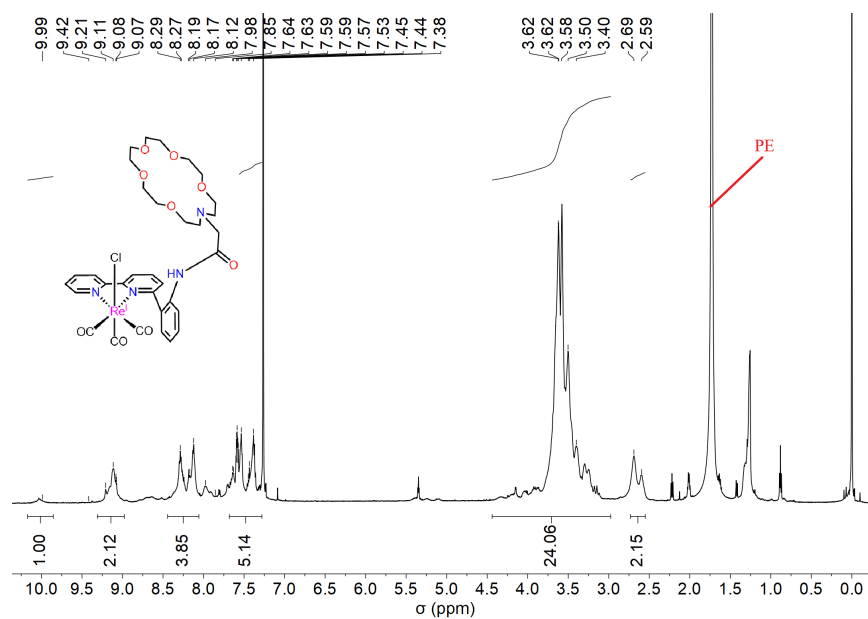

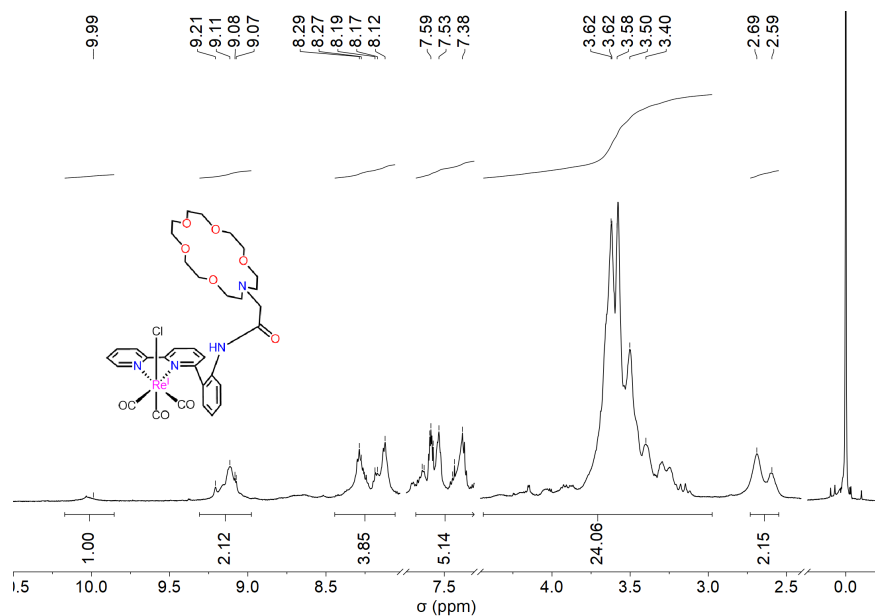

Figure S 7  $^1\text{H}$  NMR (Chloroform, 600 MHz) spectrum of **2**.

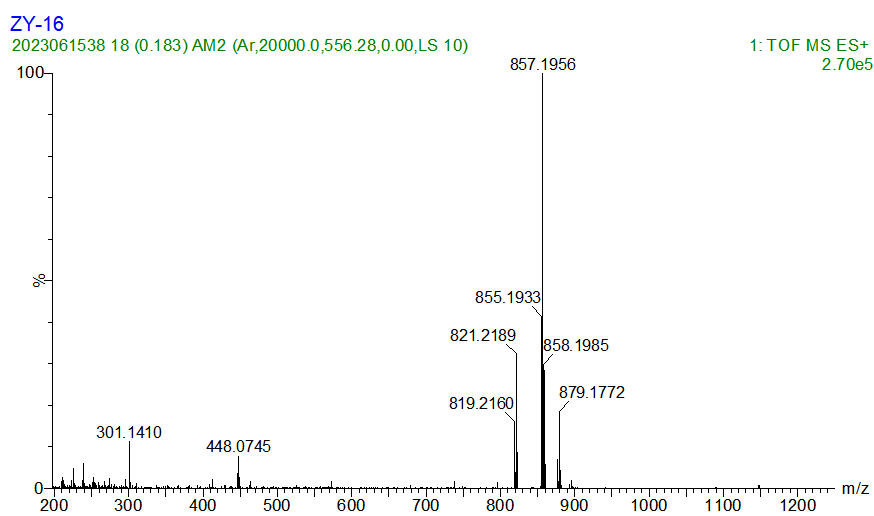

Figure S 8 high resolution mass spectrum of **2**.

### Synthesis of complexes **3**

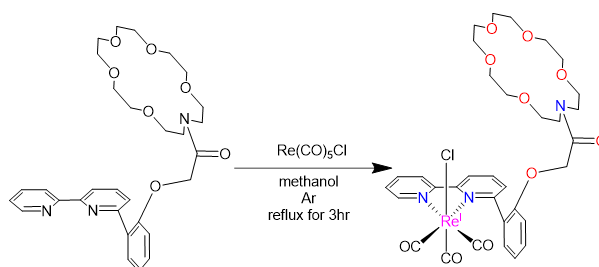

Scheme S 7 preparation of target complex **3**.

**Preparation of complexes **3**.** Compound  $\text{Re}(\text{CO})_5\text{Cl}$  (0.11 g, 0.30 mmol) was added to a degassed methanol solution (2.00 mL) of 1 equiv **L**<sub>3</sub>. The resulting colorless solution was heated to reflux for 3 h under argon, then allowed to cool to room temperature before filtration. The filtrate was collected and concentrated, then washed with  $\text{Et}_2\text{O}$  and dried in vacuo to afford yellow product (0.20 g, 0.23 mmol, 76.66% yield). The following were observed for the mixture of atropisomers:  $^1\text{H}$  NMR (600 MHz, Chloroform)  $\delta$  9.09 (1H, d), 8.26-8.14 (2H, m), 8.06-7.98 (4H, m), 7.53-7.37 (3H, m), 7.15 (1H, d), 5.06 (1H, d), 4.83 (1H, d), 3.89-3.40 (24H, m); IR (KBr, Figure S 13)  $\nu_{\text{CO}}$ : 2021 (s), 1917 (s), 1892 (s)  $\text{cm}^{-1}$ ; Anal. Calcd for **3**,  $\text{C}_{33}\text{H}_{37}\text{ClN}_3\text{O}_{10}\text{Re}$ : C, 46.23; H, 4.35; N, 4.90; found: C, 46.22; H, 4.33; N, 4.91; MS (TOF-ES):  $m/z = 822.2031$  [ $\text{M} - \text{Cl}^-$ ]<sup>+</sup>,  $m/z = 880.1610$  [ $\text{M} + \text{Na}^+$ ]<sup>+</sup>.

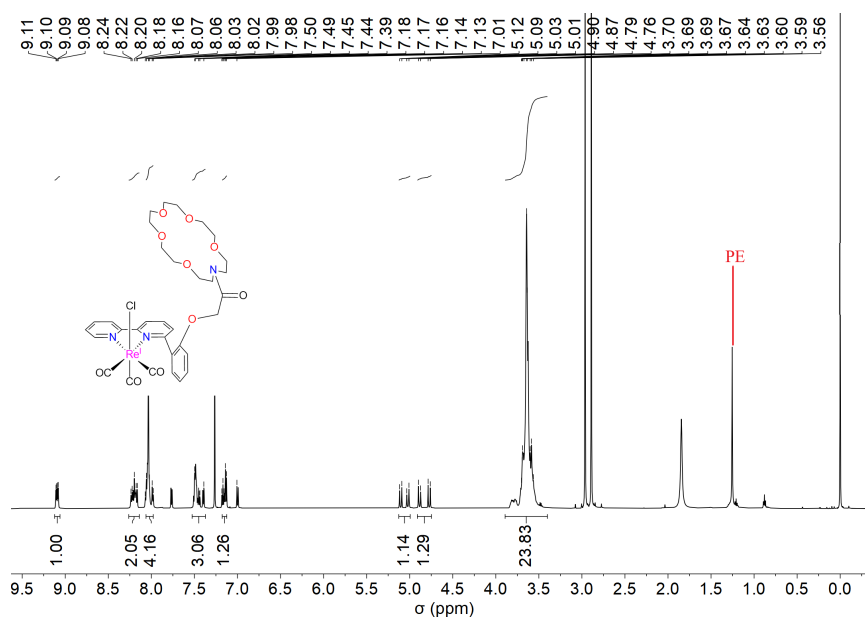

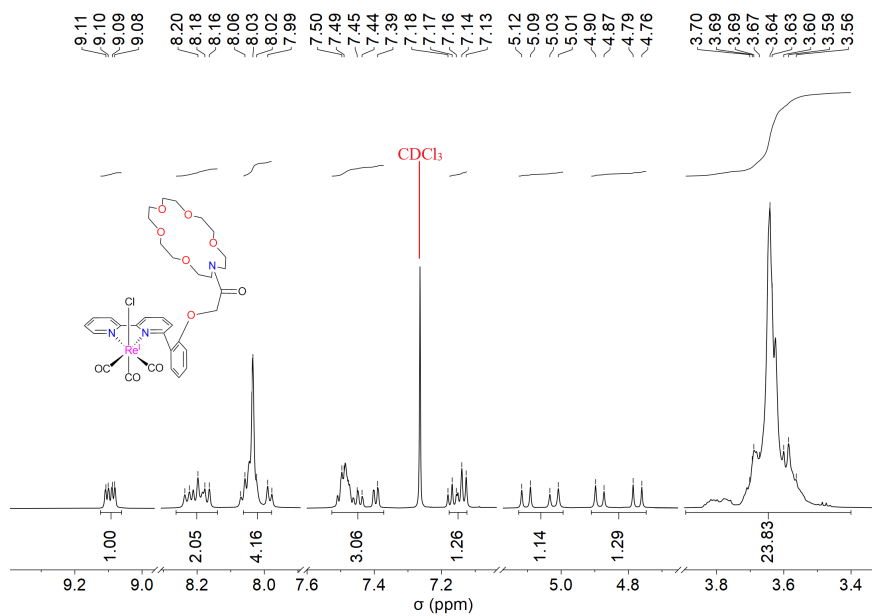

Figure S 9 <sup>1</sup>H NMR (Chloroform, 600 MHz) spectrum of **3**.

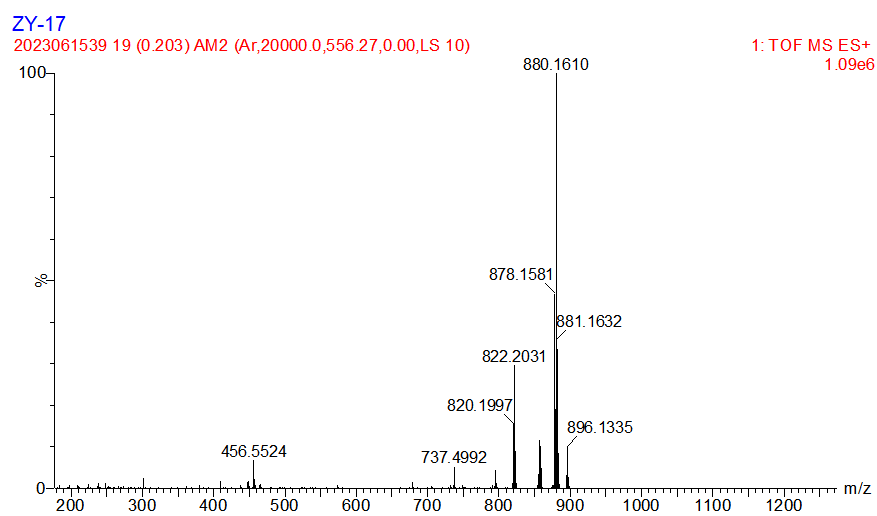

Figure S 10 high resolution mass spectrum of **3**.

## Synthesis of complexes 4

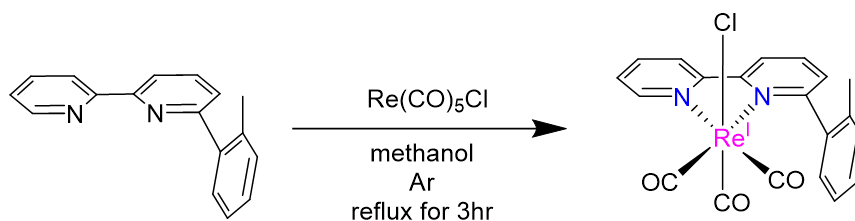

Scheme S 8 preparation of target complex 4.

**Preparation of complexes 4.** Compound  $\text{Re}(\text{CO})_5\text{Cl}$  (0.10 g, 0.28 mmol) was added to a degassed methanol solution (2.00 mL) of 1 equiv **L4**. The resulting colorless solution was heated to reflux for 3 h under argon, then allowed to cool to room temperature before filtration. The filtrate was collected and concentrated, then washed with  $\text{Et}_2\text{O}$  and dried in vacuo to afford yellow product (0.12 g, 0.22 mmol, 78.57% yield). The following were observed for the mixture of atropisomers:  $^1\text{H}$  NMR (600 MHz, Chloroform)  $\delta$  9.11 (1H, t), 8.29-8.19 (2H, m), 8.07 (2H, d), 7.56-7.44 (3H, m), 7.37 (2H, t), 7.27 (1H, d), 2.32 (2H, s), 2.22 (1H, s); IR (KBr, Figure S 13)  $\nu_{\text{CO}}$ : 2023 (s), 1917 (s), 1895 (s)  $\text{cm}^{-1}$ ; Anal. Calcd for **4**,  $\text{C}_{20}\text{H}_{14}\text{ClN}_2\text{O}_3\text{Re}$ : C, 43.52; H, 2.56; N, 5.07; found: C, 43.55; H, 2.51; N, 5.05; MS (TOF-ES):  $m/z = 517.0560$   $[\text{M} - \text{Cl}]^+$ ,  $m/z = 575.0141$   $[\text{M} + \text{Na}]^+$ ,  $m/z = 590.9879$   $[\text{M} + \text{K}]^+$ .

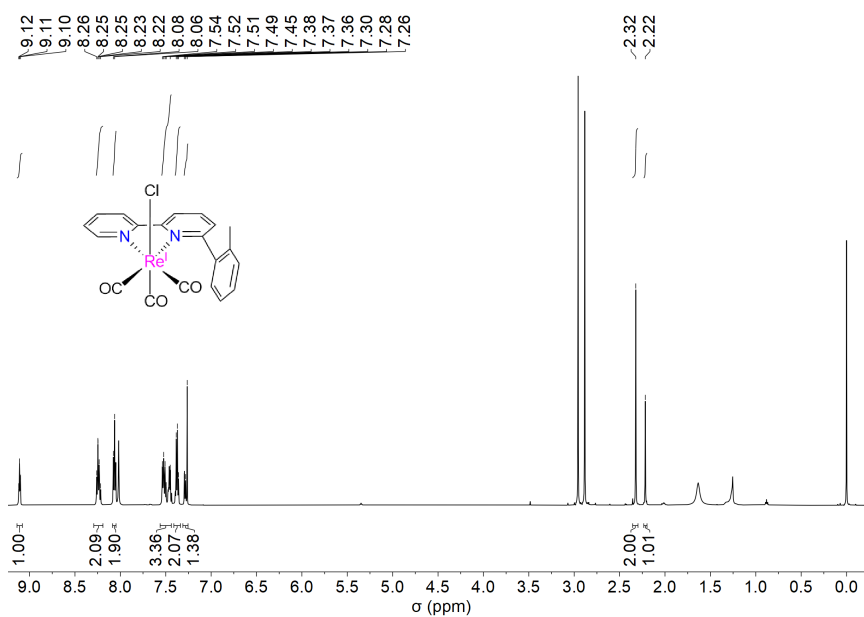



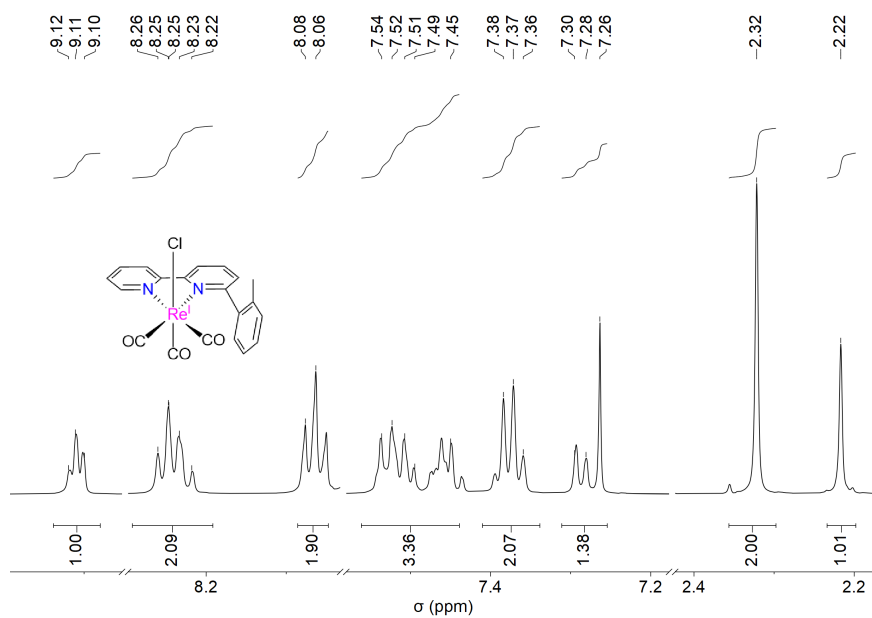

Figure S 11  $^1\text{H}$  NMR (Chloroform, 600 MHz) spectrum of **4**.

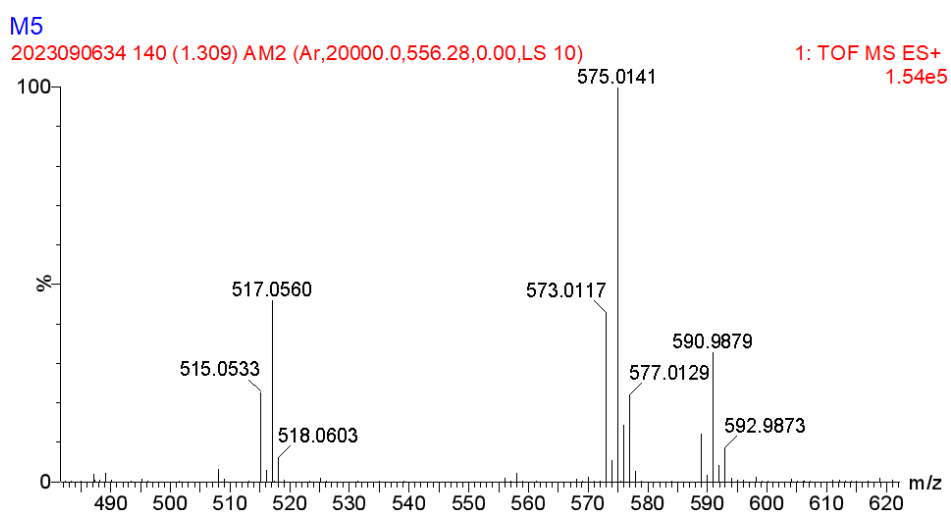

Figure S 12 high resolution mass spectrum of **4**.

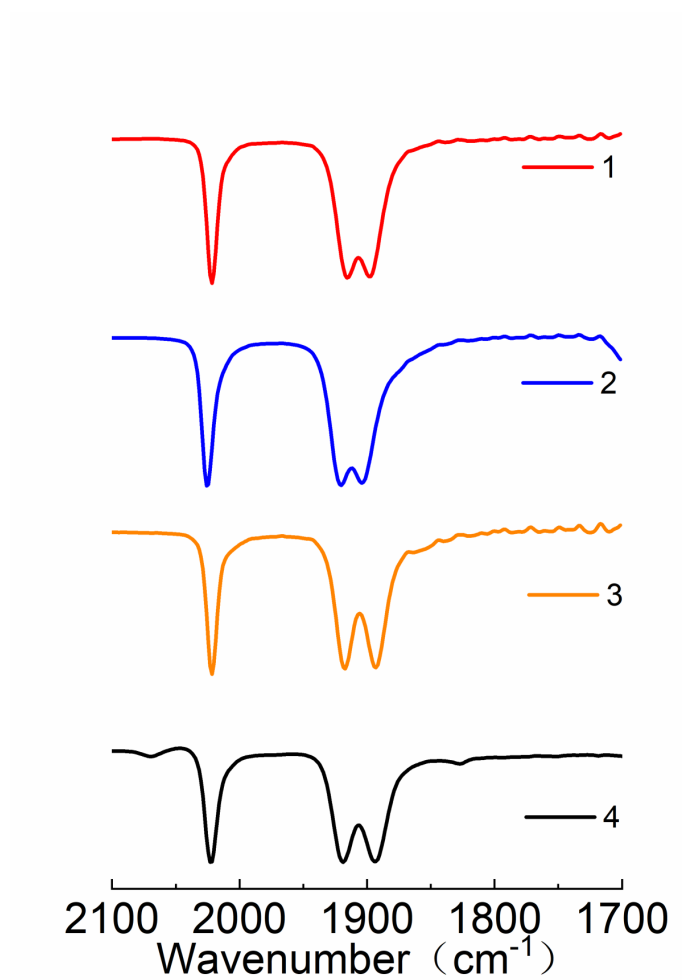

Figure S 13 Experimental FTIR spectra of 1-4 recorded in KBr displaying characteristic  $\nu_{CO}$  stretching modes for their facial tricarbonyl geometries.

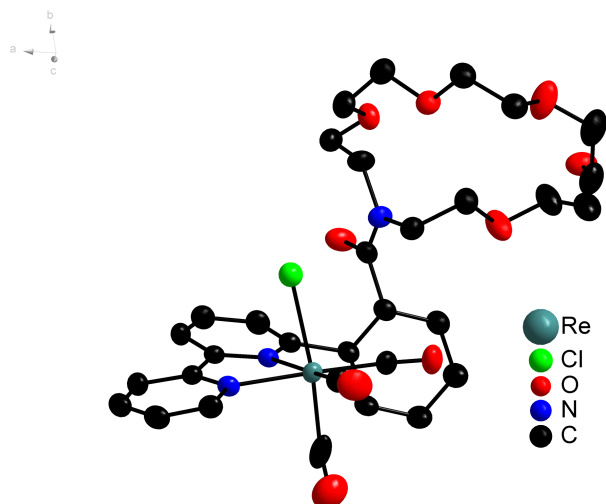

Figure S 14 Crystal structure of complex **1** with ellipsoids at 50% probability

Table S 1 Crystal data and structure refinement for **1**.

| Empirical formula                                            | C <sub>32</sub> H <sub>35</sub> ClN <sub>3</sub> O <sub>9</sub> Re           |
|--------------------------------------------------------------|------------------------------------------------------------------------------|
| Formula weight                                               | 827.28                                                                       |
| Temperature/K                                                | 220.00(10)                                                                   |
| Crystal system                                               | triclinic                                                                    |
| Space group                                                  | P-1                                                                          |
| <i>a</i> /Å                                                  | 10.0720(2)                                                                   |
| <i>b</i> /Å                                                  | 10.7211(3)                                                                   |
| <i>c</i> /Å                                                  | 15.6647(4)                                                                   |
| $\alpha$ /°                                                  | 80.945(2)                                                                    |
| $\beta$ /°                                                   | 80.953(2)                                                                    |
| $\gamma$ /°                                                  | 75.907(2)                                                                    |
| Volume/Å <sup>3</sup>                                        | 1607.63(7)                                                                   |
| <i>Z</i>                                                     | 2                                                                            |
| $\rho_{\text{calc}}$ /cm <sup>3</sup>                        | 1.709                                                                        |
| $\mu$ /mm <sup>-1</sup>                                      | 8.658                                                                        |
| F(000)                                                       | 824.0                                                                        |
| Crystal size/mm <sup>3</sup>                                 | 0.15 × 0.13 × 0.11                                                           |
| Radiation                                                    | Cu K $\alpha$ ( $\lambda$ = 1.54184)                                         |
| 2 $\theta$ range for data collection/°                       | 5.758 to 154.45                                                              |
| Index ranges                                                 | -12 ≤ <i>h</i> ≤ 12, -13 ≤ <i>k</i> ≤ 13, -19 ≤ <i>l</i> ≤ 19                |
| Reflections collected                                        | 21513                                                                        |
| Independent reflections                                      | 6472 [ <i>R</i> <sub>int</sub> = 0.0768, <i>R</i> <sub>sigma</sub> = 0.0564] |
| Data/restraints/parameters                                   | 6472/355/415                                                                 |
| Goodness-of-fit on F <sup>2</sup>                            | 1.088                                                                        |
| Final <i>R</i> indexes [ <i>I</i> ≥ 2 $\sigma$ ( <i>I</i> )] | <i>R</i> <sub>1</sub> = 0.0489, <i>wR</i> <sub>2</sub> = 0.1342              |
| Final <i>R</i> indexes [all data]                            | <i>R</i> <sub>1</sub> = 0.0524, <i>wR</i> <sub>2</sub> = 0.1360              |

|                                             |                                                                    |
|---------------------------------------------|--------------------------------------------------------------------|
| Empirical formula                           | C <sub>32</sub> H <sub>35</sub> ClN <sub>3</sub> O <sub>9</sub> Re |
| Largest diff. peak/hole / e Å <sup>-3</sup> | 1.08/-1.01                                                         |

Table S 2 Bond Lengths for **1**.

| Atom | Atom | Length/Å   | Atom | Atom | Length/Å  |
|------|------|------------|------|------|-----------|
| Re1  | C11  | 2.5062(15) | N3   | C25  | 1.347(7)  |
| Re1  | N2   | 2.232(4)   | N3   | C29  | 1.359(7)  |
| Re1  | N3   | 2.167(5)   | C1   | C2   | 1.516(9)  |
| Re1  | C30  | 1.913(6)   | C3   | C4   | 1.500(9)  |
| Re1  | C31  | 1.936(5)   | C5   | C6   | 1.511(11) |
| Re1  | C32  | 2.012(7)   | C7   | C8   | 1.497(12) |
| O1   | C2   | 1.424(7)   | C9   | C10  | 1.505(9)  |
| O1   | C12  | 1.428(7)   | C11  | C12  | 1.520(9)  |
| O2   | C1   | 1.413(8)   | C13  | C14  | 1.505(8)  |
| O2   | C3   | 1.412(7)   | C14  | C15  | 1.398(8)  |
| O3   | C4   | 1.412(8)   | C14  | C19  | 1.416(8)  |
| O3   | C5   | 1.413(9)   | C15  | C16  | 1.382(9)  |
| O4   | C6   | 1.404(8)   | C16  | C17  | 1.402(9)  |
| O4   | C7   | 1.421(8)   | C17  | C18  | 1.382(9)  |
| O5   | C8   | 1.418(8)   | C18  | C19  | 1.404(8)  |
| O5   | C9   | 1.416(7)   | C19  | C20  | 1.499(8)  |
| O6   | C13  | 1.231(7)   | C20  | C21  | 1.392(8)  |
| O7   | C30  | 1.158(7)   | C21  | C22  | 1.381(9)  |
| O8   | C31  | 1.122(6)   | C22  | C23  | 1.381(8)  |
| O9   | C32  | 1.035(7)   | C23  | C24  | 1.392(7)  |
| N1   | C10  | 1.449(7)   | C24  | C25  | 1.482(7)  |
| N1   | C11  | 1.476(7)   | C25  | C26  | 1.388(8)  |
| N1   | C13  | 1.346(7)   | C26  | C27  | 1.381(8)  |
| N2   | C20  | 1.350(7)   | C27  | C28  | 1.362(9)  |
| N2   | C24  | 1.355(7)   | C28  | C29  | 1.379(9)  |

Table S 3 Bond Angles for 1.

| Atom | Atom | Atom | Angle/°    | Atom | Atom | Atom | Angle/°  |
|------|------|------|------------|------|------|------|----------|
| N2   | Re1  | C11  | 80.04(11)  | O5   | C9   | C10  | 108.0(5) |
| N3   | Re1  | C11  | 85.45(13)  | N1   | C10  | C9   | 114.2(5) |
| N3   | Re1  | N2   | 75.22(17)  | N1   | C11  | C12  | 113.2(5) |
| C30  | Re1  | C11  | 96.37(19)  | O1   | C12  | C11  | 109.1(5) |
| C30  | Re1  | N2   | 104.1(2)   | O6   | C13  | N1   | 122.6(5) |
| C30  | Re1  | N3   | 178.0(2)   | O6   | C13  | C14  | 118.4(5) |
| C30  | Re1  | C31  | 84.9(3)    | N1   | C13  | C14  | 119.0(5) |
| C30  | Re1  | C32  | 89.0(3)    | C15  | C14  | C13  | 118.5(5) |
| C31  | Re1  | C11  | 94.16(19)  | C15  | C14  | C19  | 119.1(5) |
| C31  | Re1  | N2   | 169.7(2)   | C19  | C14  | C13  | 122.0(5) |
| C31  | Re1  | N3   | 95.9(2)    | C16  | C15  | C14  | 121.3(5) |
| C31  | Re1  | C32  | 91.9(3)    | C15  | C16  | C17  | 119.7(6) |
| C32  | Re1  | C11  | 172.21(18) | C18  | C17  | C16  | 120.0(6) |
| C32  | Re1  | N2   | 93.2(2)    | C17  | C18  | C19  | 120.8(5) |
| C32  | Re1  | N3   | 89.1(2)    | C14  | C19  | C20  | 122.8(5) |
| C2   | O1   | C12  | 111.2(4)   | C18  | C19  | C14  | 119.1(5) |
| C3   | O2   | C1   | 111.9(5)   | C18  | C19  | C20  | 117.8(5) |
| C4   | O3   | C5   | 114.3(6)   | N2   | C20  | C19  | 119.4(5) |
| C6   | O4   | C7   | 113.9(6)   | N2   | C20  | C21  | 121.4(5) |
| C9   | O5   | C8   | 114.9(5)   | C21  | C20  | C19  | 119.0(5) |
| C10  | N1   | C11  | 117.0(4)   | C22  | C21  | C20  | 120.2(5) |
| C13  | N1   | C10  | 125.8(5)   | C21  | C22  | C23  | 118.5(5) |
| C13  | N1   | C11  | 117.3(5)   | C22  | C23  | C24  | 119.3(5) |
| C20  | N2   | Re1  | 126.9(4)   | N2   | C24  | C23  | 122.2(5) |
| C20  | N2   | C24  | 118.4(4)   | N2   | C24  | C25  | 116.5(4) |
| C24  | N2   | Re1  | 113.5(3)   | C23  | C24  | C25  | 121.3(5) |
| C25  | N3   | Re1  | 117.0(3)   | N3   | C25  | C24  | 115.9(5) |
| C25  | N3   | C29  | 118.4(5)   | N3   | C25  | C26  | 121.1(5) |
| C29  | N3   | Re1  | 124.6(4)   | C26  | C25  | C24  | 123.0(5) |
| O2   | C1   | C2   | 109.5(5)   | C27  | C26  | C25  | 119.9(6) |
| O1   | C2   | C1   | 109.3(5)   | C28  | C27  | C26  | 119.1(5) |
| O2   | C3   | C4   | 110.3(5)   | C27  | C28  | C29  | 119.2(5) |
| O3   | C4   | C3   | 107.2(5)   | N3   | C29  | C28  | 122.2(6) |
| O3   | C5   | C6   | 112.7(6)   | O7   | C30  | Re1  | 175.0(5) |
| O4   | C6   | C5   | 107.7(6)   | O8   | C31  | Re1  | 179.7(7) |
| O4   | C7   | C8   | 110.1(7)   | O9   | C32  | Re1  | 172.9(7) |
| O5   | C8   | C7   | 112.9(7)   |      |      |      |          |

## 9. Detail discussions on the IR-SEC of complexes

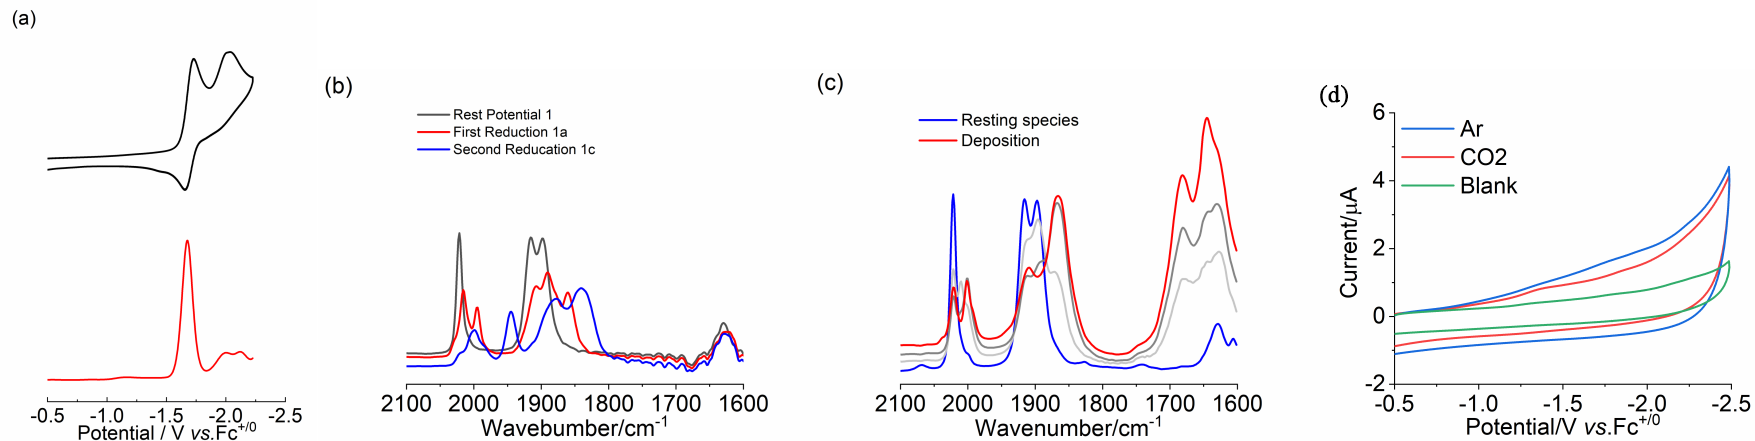

Figure S 15 (a) CV and DPV of complex **1** (0.5 mM) in acetonitrile under Ar. (b) IR-SEC of 3 mM precursor **1** (black, 2022 1916 and 1897 cm<sup>-1</sup>) under an atmosphere of Ar in MeCN with 25mM KPF<sub>6</sub> and 0.1 M <sup>n</sup>Bu<sub>4</sub>NPF<sub>6</sub> as the supporting electrolyte, showing two major species as the potential is increased cathodically: **(Re<sup>I</sup>(bpy<sup>+</sup>)(CO)<sub>3</sub>Cl)** coordination model (red, 1997 1890 and 1861 cm<sup>-1</sup>), the doubly reduced species **(Re<sup>0</sup>(bpy<sup>+</sup>)(CO)<sub>3</sub>)** (blue, 1946 and 1841 cm<sup>-1</sup>). (c) IR-SEC of 3 mM **1** at -1.9 V under CO<sub>2</sub> in the presence of 25 mM KPF<sub>6</sub> in acetonitrile with 0.1 M <sup>n</sup>Bu<sub>4</sub>NPF<sub>6</sub> electrolyte. The resting species (blue, **1**) has three  $\nu_{CO}$  stretches at 2023, 1924, and 1897 cm<sup>-1</sup>. When the voltage of the cell is held at approximately -1.9 V for more than 1 min, the deposition (red) formed with four  $\nu_{CO}$  stretches at 2000, 1866, 1681 and 1645 cm<sup>-1</sup>. (d) CVs of 25 mM KPF<sub>6</sub> under Ar (blue line) and CO<sub>2</sub> (red line).

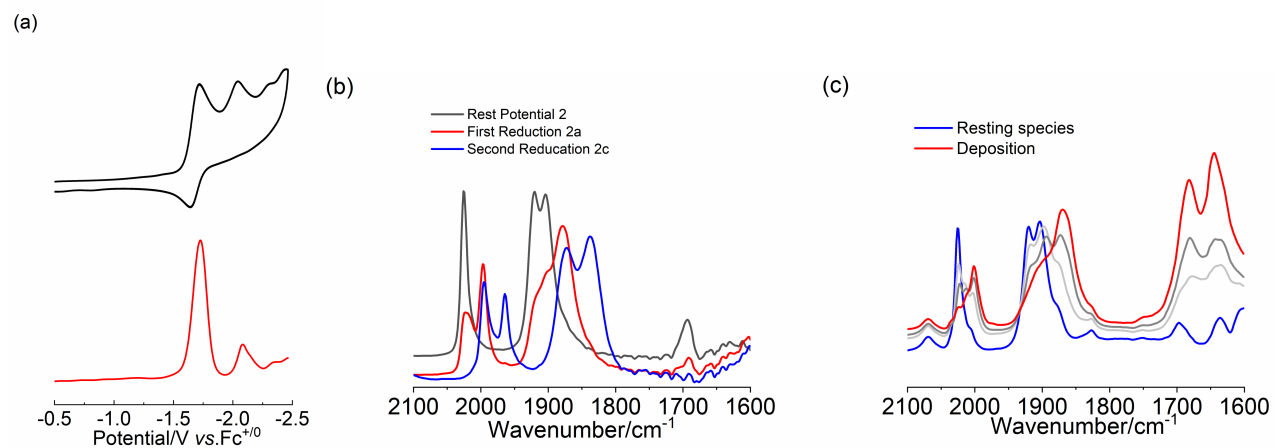

Figure S 16 (a) CV and DPV of complex **2** (0.5 mM) in acetonitrile under Ar. (b) IR-SEC of 3 mM precursor **2** (black, 2025 1920 and 1904 cm<sup>-1</sup>) under an atmosphere of Ar in MeCN with 25mM KPF<sub>6</sub> and 0.1 M <sup>n</sup>Bu<sub>4</sub>NPF<sub>6</sub> as the supporting electrolyte, showing two major species as the potential is increased cathodically: **(Re<sup>I</sup>(bpy<sup>-</sup>)(CO)<sub>3</sub>Cl)** coordination model (red, 1997 1902 and 1880 cm<sup>-1</sup>), the doubly reduced species **(Re<sup>0</sup>(bpy<sup>-</sup>)(CO)<sub>3</sub>)** (blue, 1964 and 1839 cm<sup>-1</sup>). (c) IR-SEC of 3 mM **2** at -1.9 V under CO<sub>2</sub> in the presence of 25 mM KPF<sub>6</sub> in acetonitrile with 0.1 M <sup>n</sup>Bu<sub>4</sub>NPF<sub>6</sub> electrolyte. The resting species (blue, **2**) has three  $\nu_{CO}$  stretches at 2026, 1920, and 1904 cm<sup>-1</sup>. When the voltage of the cell is held at approximately -1.9 V for more than 1 min, the deposition (red) formed with four  $\nu_{CO}$  stretches at 2001, 1870, 1682 and 1644 cm<sup>-1</sup>.



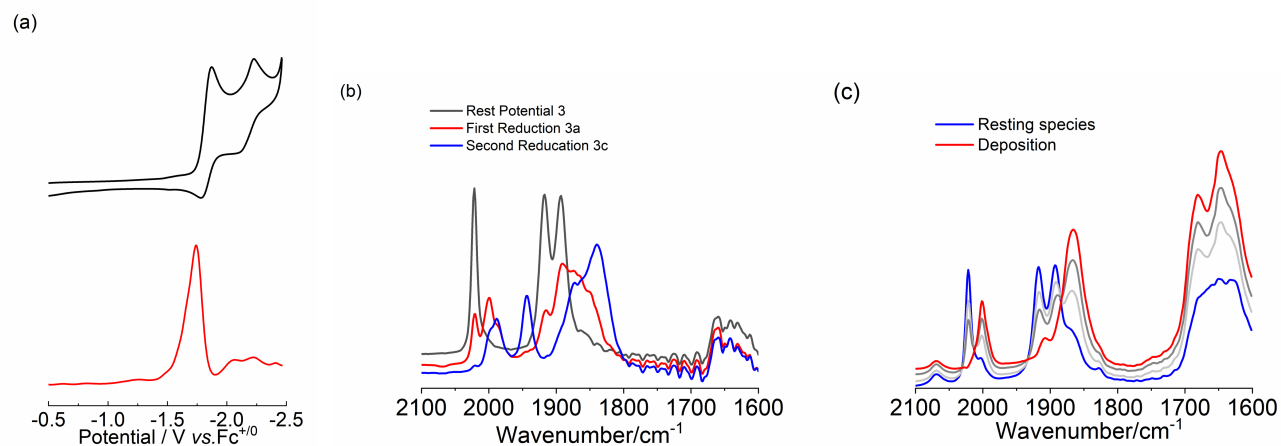

Figure S 17 (a) CV and DPV of complex **3** (0.5 mM) in acetonitrile under Ar. (b) IR-SEC of 3 mM precursor **3** (black, 2022 1917 and 1893 cm<sup>-1</sup>) under an atmosphere of Ar in MeCN with 25mM KPF<sub>6</sub> and 0.1 M <sup>n</sup>Bu<sub>4</sub>NPF<sub>6</sub> as the supporting electrolyte, showing two major species as the potential is increased cathodically: **(Re<sup>I</sup>(bpy<sup>-</sup>)(CO)<sub>3</sub>)Cl** coordination model (red, 2000 1874 and 1866 cm<sup>-1</sup>), the doubly reduced species **(Re<sup>0</sup>(bpy<sup>-</sup>)(CO)<sub>3</sub>)** (blue, 1944 and 1840 cm<sup>-1</sup>). (c) IR-SEC of 3 mM **3** at -1.9 V under CO<sub>2</sub> in the presence of 25 mM KPF<sub>6</sub> in acetonitrile with 0.1 M <sup>n</sup>Bu<sub>4</sub>NPF<sub>6</sub> electrolyte. The resting species (blue, **3**) has three  $\nu_{CO}$  stretches at 2022, 1917, and 1893 cm<sup>-1</sup>. When the voltage of the cell is held at approximately -1.9 V for more than 1 min, the deposition (red) formed with four  $\nu_{CO}$  stretches at 2002, 1866, 1681 and 1647 cm<sup>-1</sup>.

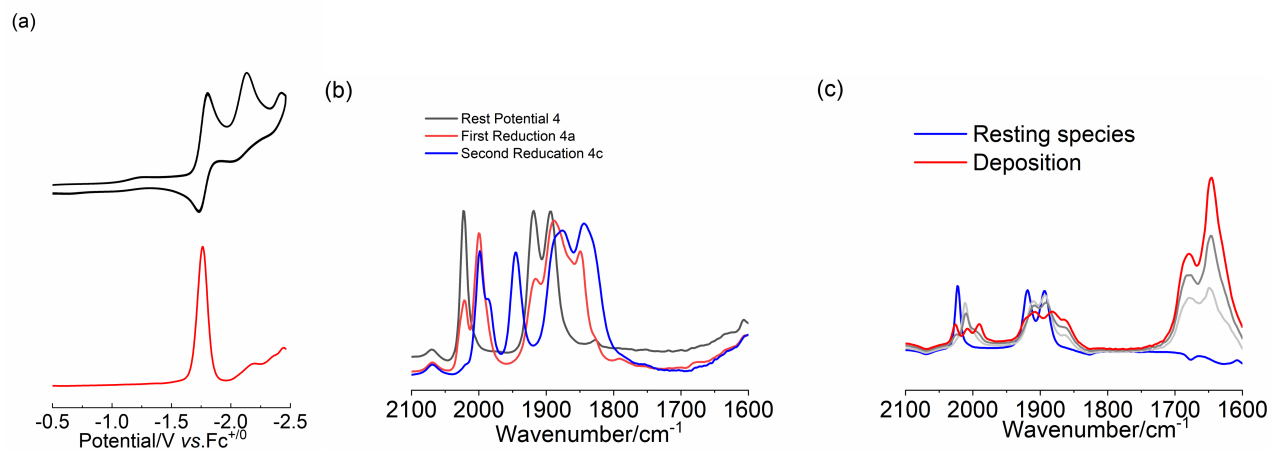

Figure S 18 (a) CV and DPV of complex **4** (0.5 mM) in acetonitrile under Ar. (b) IR-SEC of 3 mM precursor **4** (black, 2022 1918 and 1893 cm<sup>-1</sup>) under an atmosphere of Ar in MeCN with 25mM KPF<sub>6</sub> and 0.1 M <sup>n</sup>Bu<sub>4</sub>NPF<sub>6</sub> as the supporting electrolyte, showing two major species as the potential is increased cathodically: **(Re<sup>I</sup>(bpy<sup>+</sup>)(CO)<sub>3</sub>)Cl** coordination model (red, 2000 1888 and 1850 cm<sup>-1</sup>), the doubly reduced species **(Re<sup>0</sup>(bpy<sup>-</sup>)(CO)<sub>3</sub>)** (blue, 1946 and 1844 cm<sup>-1</sup>). (c) IR-SEC of 3 mM **4** at -1.9 V under CO<sub>2</sub> in the presence of 25 mM KPF<sub>6</sub> in acetonitrile with 0.1 M <sup>n</sup>Bu<sub>4</sub>NPF<sub>6</sub> electrolyte. The resting species (blue, **4**) has three  $\nu_{CO}$  stretches at 2023, 1920, and 1894 cm<sup>-1</sup>. When the voltage of the cell is held at approximately -1.9 V for more than 1 min, the deposition (red) formed with four  $\nu_{CO}$  stretches at 1990, 1862, 1679 and 1645 cm<sup>-1</sup>.

Table S 4 The absorption peaks for the complexes **1-4**, and their corresponding mono-reduced species and doubly reduced species in the presence of 25 mM KPF<sub>6</sub> in acetonitrile solution. The data for the absorption peaks were obtained from the IR-SEC test. The control test was taken under the same condition with complex **4** in the absence of crown and KPF<sub>6</sub>.

| Complex (3 mM) | Intrinsic peak (cm <sup>-1</sup> ) | the mono- reduced species (cm <sup>-1</sup> ) | the doubly reduced species (cm <sup>-1</sup> ) |
|----------------|------------------------------------|-----------------------------------------------|------------------------------------------------|
| <b>1</b>       | 2022、1916、1897                     | 1997、1890、1861                                | 1946、1841                                      |
| <b>2</b>       | 2025、1920、1904                     | 1997、1902、1880                                | 1964、1839                                      |
| <b>3</b>       | 2022、1917、1893                     | 2000、1874、1866                                | 1944、1840                                      |
| <b>4</b>       | 2022、1918、1893                     | 2000、1888、1850                                | 1946、1844                                      |
| <b>4</b>       | 2021、1918、1892                     | 1999、1879、1849                                | 1946、1843                                      |

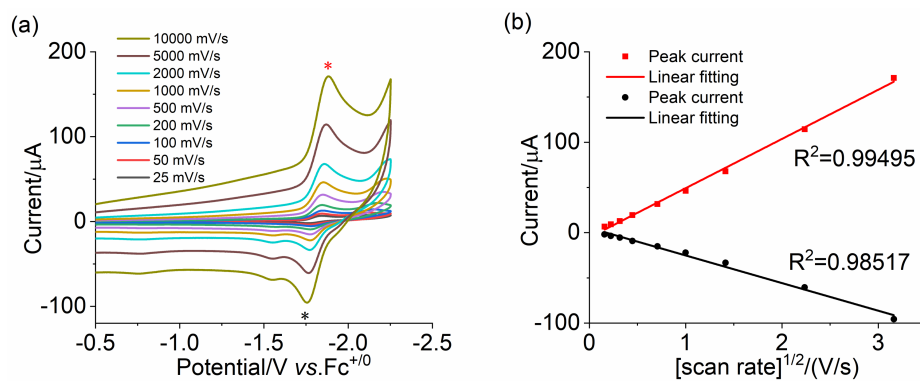

Figure S 19 (a) CVs of complex **1** (0.5 mM) with scan rate ( $\nu$ ) varied from 0.025 V/s to 10 V/s under Ar; (b) Plot of redox peak current ( $i_p$ ) vs.  $\nu^{1/2}$  for complex **1**. Voltammograms are taken with 0.1 M  $n\text{-Bu}_4\text{NPF}_6$  in MeCN solution. Glassy carbon working electrode,  $\text{Ag}^+/\text{Ag}$  reference electrode, and Pt wire counter electrode.

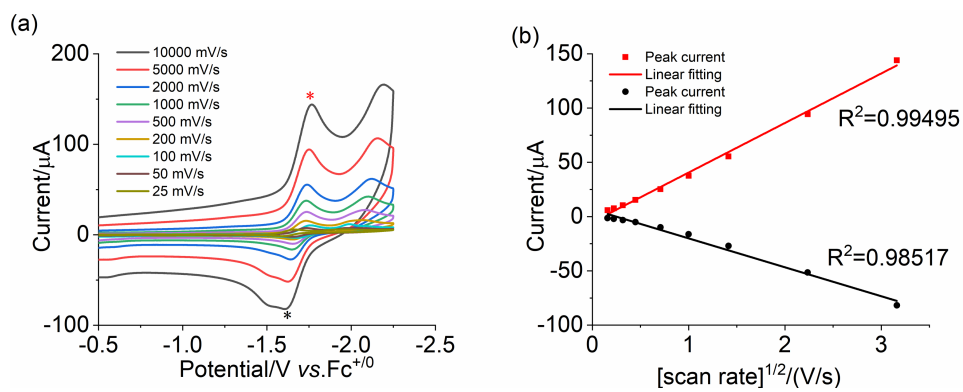

Figure S 20 (a) CVs of complex **2** (0.5 mM) with scan rate ( $v$ ) varied from 0.025 V/s to 10 V/s under Ar; (b) Plot of redox peak current ( $i_p$ ) vs.  $v^{1/2}$  for complex **2**. Voltammograms are taken with 0.1 M <sup>n</sup>Bu<sub>4</sub>NPF<sub>6</sub> in MeCN solution. Glassy carbon working electrode, Ag<sup>+</sup>/Ag reference electrode, and Pt wire counter electrode.

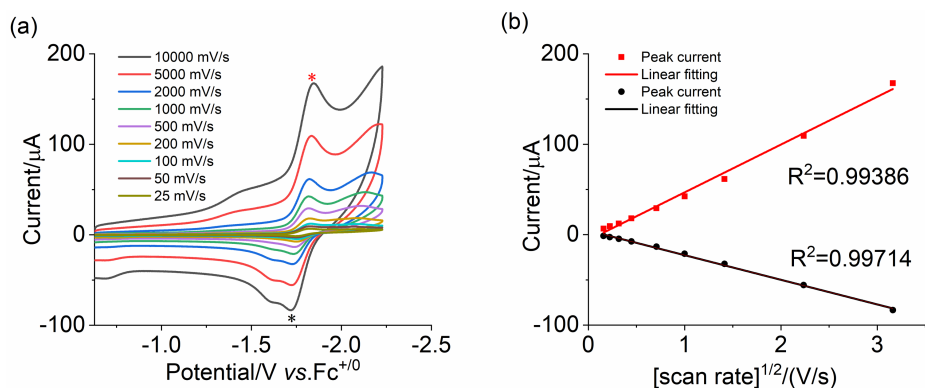

Figure S 21 (a) CVs of complex **3** (0.5 mM) with scan rate ( $\nu$ ) varied from 0.025 V/s to 10 V/s under Ar; (b) Plot of redox peak current ( $i_p$ ) vs.  $\nu^{1/2}$  for complex **3**. Voltammograms are taken with 0.1 M <sup>n</sup>Bu<sub>4</sub>NPF<sub>6</sub> in MeCN solution. Glassy carbon working electrode, Ag<sup>+</sup>/Ag reference electrode, and Pt wire counter electrode.

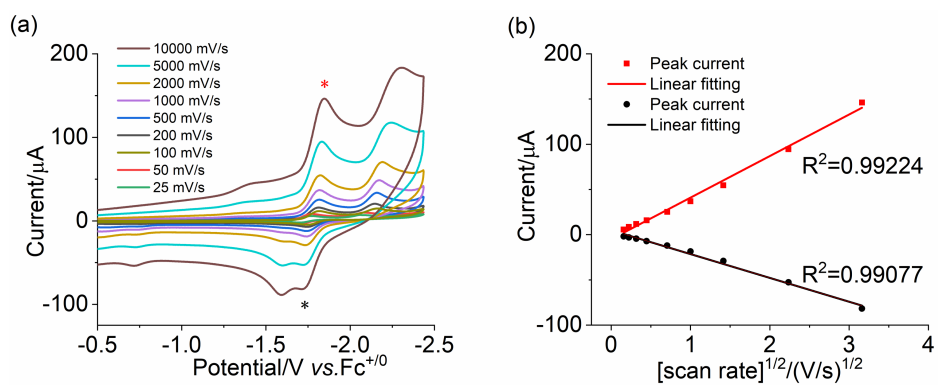

Figure S 22 (a) CVs of complex **4** (0.5 mM) with scan rate ( $\nu$ ) varied from 0.025 V/s to 10 V/s under Ar; (b) Plot of redox peak current ( $i_p$ ) vs.  $\nu^{1/2}$  for complex **4**. Voltammograms are taken with 0.1 M  $n\text{-Bu}_4\text{NPF}_6$  in MeCN solution. Glassy carbon working electrode,  $\text{Ag}^+/\text{Ag}$  reference electrode, and Pt wire counter electrode.

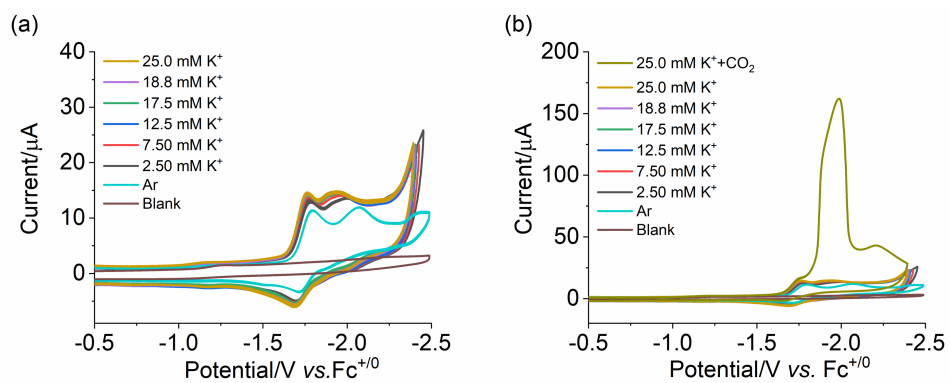

Figure S 23 (a) CVs of 0.5 mM **1** with varied concentrations of KPF<sub>6</sub> under Ar. (b) CVs show 0.5 mM **1** with varied amounts of KPF<sub>6</sub> under Ar, and saturated with CO<sub>2</sub> in the presence of 25 mM KPF<sub>6</sub>. Voltammograms are taken at a scan rate of 100 mV/s with 0.1 M <sup>n</sup>Bu<sub>4</sub>NPF<sub>6</sub> in MeCN solution. Glassy carbon working electrode, Ag<sup>+</sup>/Ag reference electrode, and Pt wire counter electrode.



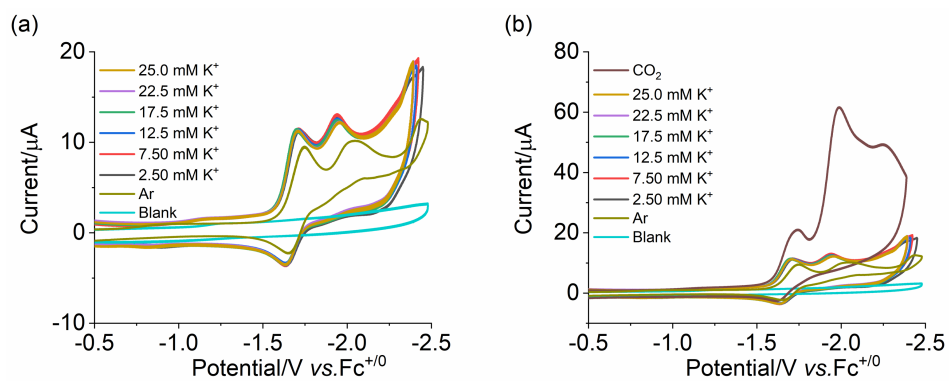

Figure S 24 (a) CVs of 0.5 mM **2** with varied concentrations of KPF<sub>6</sub> under Ar. (b) CVs show 0.5 mM **2** with varied amounts of KPF<sub>6</sub> under Ar, and saturated with CO<sub>2</sub> in the presence of 25 mM KPF<sub>6</sub>. Voltammograms are taken at a scan rate of 100 mV/s with 0.1 M <sup>n</sup>Bu<sub>4</sub>NPF<sub>6</sub> in MeCN solution. Glassy carbon working electrode, Ag<sup>+</sup>/Ag reference electrode, and Pt wire counter electrode.

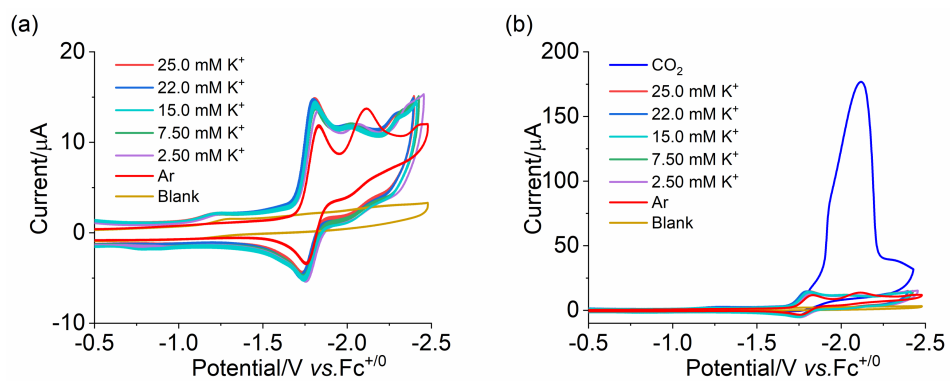

Figure S 25 (a) CVs of 0.5 mM **3** with varied concentrations of KPF<sub>6</sub> under Ar. (b) CVs show 0.5 mM **3** with varied amounts of KPF<sub>6</sub> under Ar, and saturated with CO<sub>2</sub> in the presence of 25 mM KPF<sub>6</sub>. Voltammograms are taken at a scan rate of 100 mV/s with 0.1 M <sup>n</sup>Bu<sub>4</sub>NPF<sub>6</sub> in MeCN solution. Glassy carbon working electrode, Ag<sup>+</sup>/Ag reference electrode, and Pt wire counter electrode.

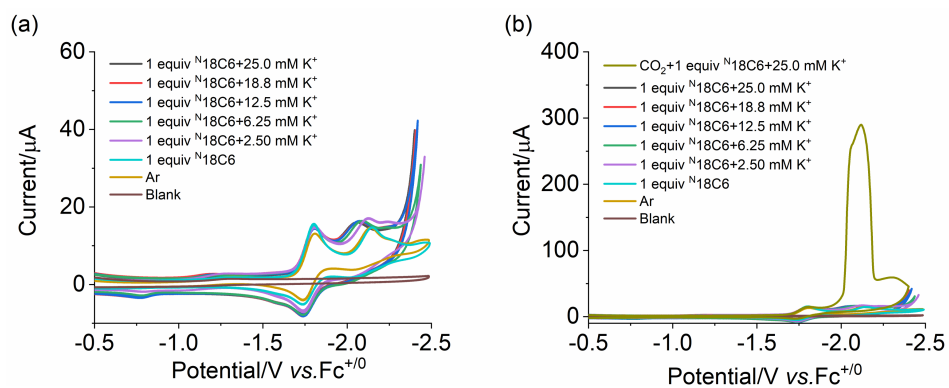

Figure S 26 (a) CVs of 0.5 mM **4** with varied concentrations of KPF<sub>6</sub> under Ar. (b) CVs show 0.5 mM **4** with varied amounts of KPF<sub>6</sub> under Ar, and saturated with CO<sub>2</sub> in the presence of 25 mM KPF<sub>6</sub>. Voltammograms are taken at a scan rate of 100 mV/s with 0.1 M <sup>n</sup>Bu<sub>4</sub>NPF<sub>6</sub> in MeCN solution. Glassy carbon working electrode, Ag<sup>+</sup>/Ag reference electrode, and Pt wire counter electrode.

## 10. Determination of the equilibrium binding constant of $K_{K^+}$

According to the modified Nernst equation (1), as the concentration of  $K^+$  dissolved in solution varied, a gradually increasing positive shift in potential followed the increasing  $K^+$  concentration. A plot of  $E_{1/2}$  vs.  $\ln [K^+]$  was found to be linear (Figure S 27), suggesting that the modified Nernst equation (1) is applicable for the case. The second redox event for the complexes **1-4** in our manuscript are all irreversible. In operation, we use the half-peak potentials ( $E^{p/2}$ ) for representing  $E^{1/2}$  (H. G. Roth, N. A. Romero, and D. A. Nicewicz, *Synlett*, 2016, **27**, 714).  $E^0$  is the formal potential for doubly reduced intermediate ( $Re^0(bpy^-)(CO)_3$ ) in the absence of binding, and  $q$  is the number of  $K^+$  involved in the binding. The slope obtained from these results was 0.026 V/decade. This value is consistent with the binding of a single  $K^+$  to the crown. The intercept was used to obtain an equilibrium binding constant of  $K_{K^+}$ . The equilibrium binding constant of  $K_{K^+}$  for complexes **1-4** were summarized in table S 4. The equilibrium binding constant of  $K_{K^+}$  for complex **2** is *ca.* two orders larger than that for another three, which is consistent with the alkalinity of the amine in the crown. In addition, the equilibrium binding constant of  $K_{K^+}$  for complexes **1** and **3** are close to that for the complex **4** with a separated crown, implying a weaker binding effect for complexes **1** and **3**.

$$E_{1/2} = E^0 + (RT/nF) \ln K_{[K^+]} + q(RT/nF) \ln [K^+] \quad (1)$$

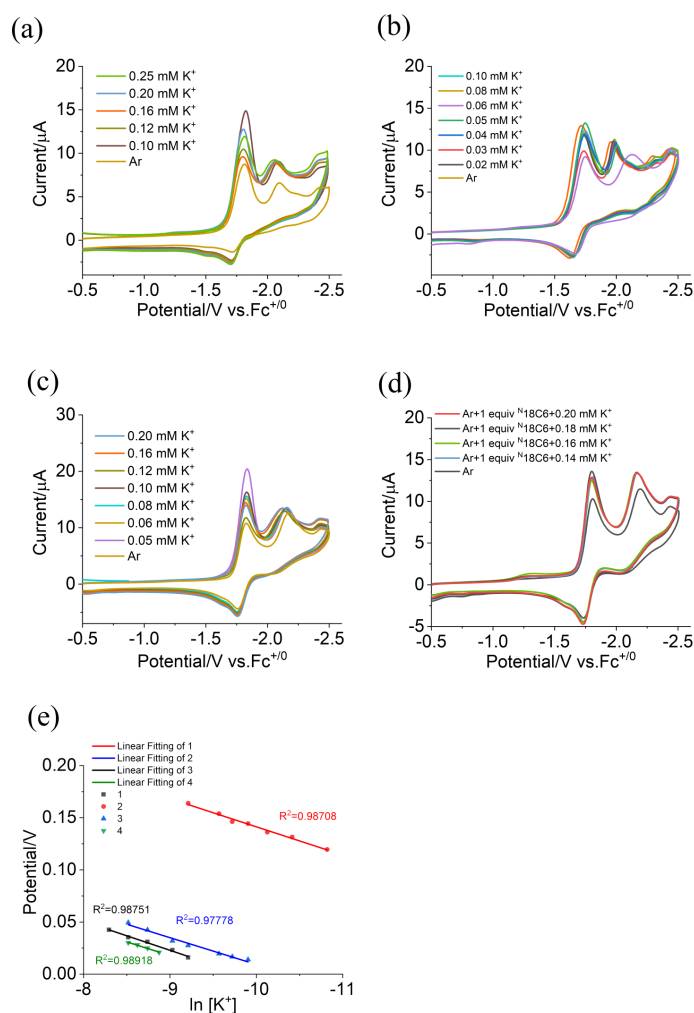

Figure S 27 (a) CVs show 0.5 mM **1** with varied concentrations of KPF<sub>6</sub> under Ar. (b) CVs show 0.5 mM **2** with varied concentrations of KPF<sub>6</sub> under Ar. (c) CVs show 0.5 mM **3** with varied concentrations of KPF<sub>6</sub> under Ar. (d) CVs show 0.5 mM **4** with varied concentrations of KPF<sub>6</sub> under Ar. (e) Plot of potential difference vs. ln [K<sup>+</sup>] for complex **1-4**. Voltammograms are taken at a scan rate of 100 mV/s with 0.1 M <sup>n</sup>Bu<sub>4</sub>NPF<sub>6</sub> in MeCN solution. Glassy carbon working electrode, Ag<sup>+</sup>/Ag reference electrode, and Pt wire counter electrode.

Table S 5 The equilibrium binding constant of  $K_{K^+}$  for complexes **1-4**

| Complex (0.5<br>mM)              | <b>1</b>          | <b>2</b>          | <b>3</b>          | <b>4</b>          |
|----------------------------------|-------------------|-------------------|-------------------|-------------------|
| Binding constant<br>of $K_{K^+}$ | $3.7 \times 10^4$ | $7.5 \times 10^6$ | $2.8 \times 10^4$ | $1.7 \times 10^4$ |

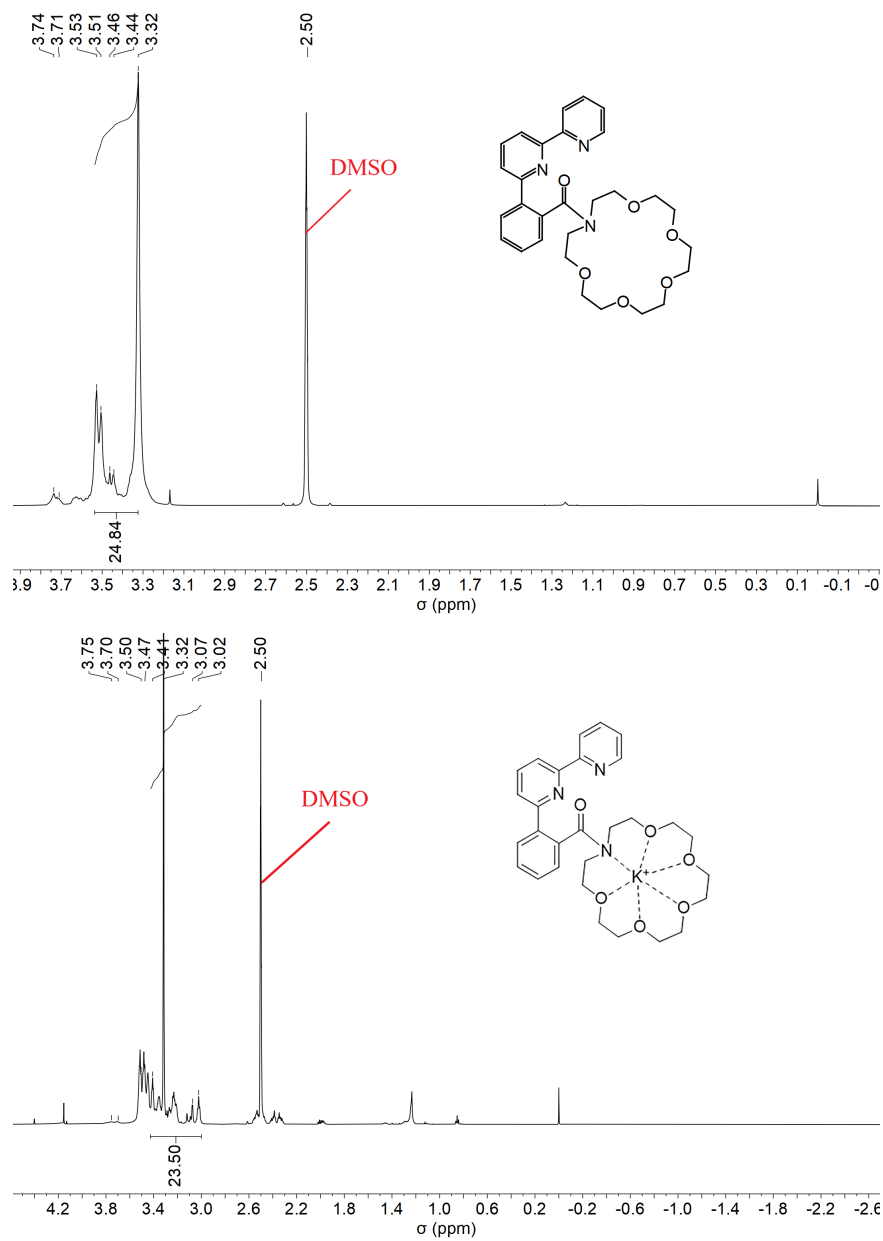

Figure S 28 (a)  $^1\text{H}$  NMR (DMSO, 600 MHz) spectrum of  $\text{L}_1$  (up). (b)  $^1\text{H}$  NMR (DMSO, 600 MHz) spectrum of  $\text{L}_1$  with  $\text{K}^+$  (down).

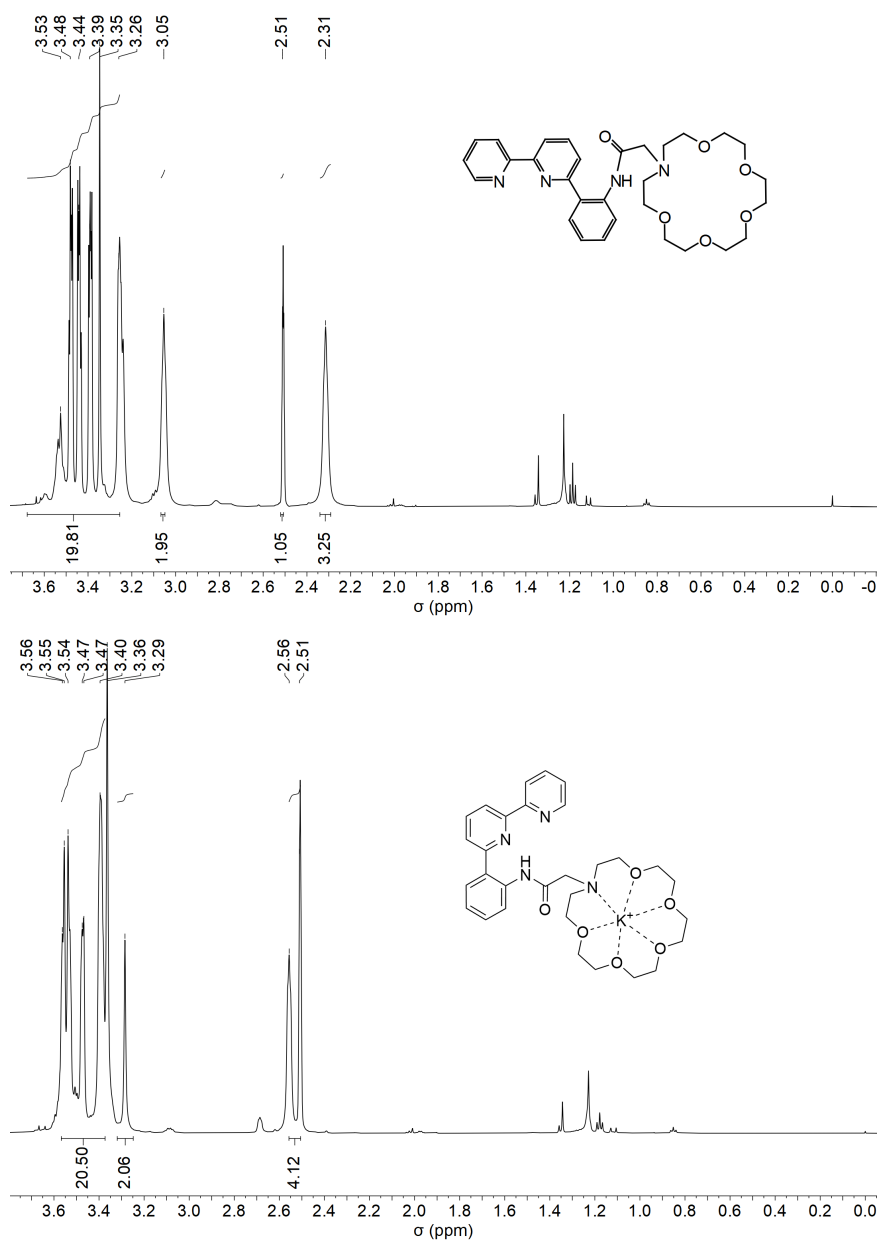

Figure S 29 (a)  $^1\text{H}$  NMR (DMSO, 600 MHz) spectrum of  $\text{L}_2$  (up). (b)  $^1\text{H}$  NMR (DMSO, 600 MHz) spectrum of  $\text{L}_2$  with  $\text{K}^+$  (down).

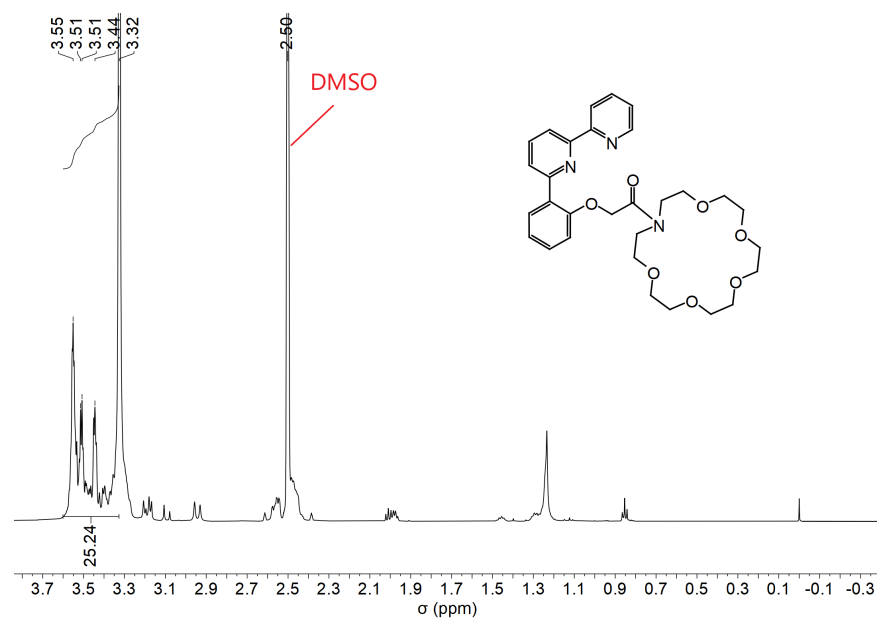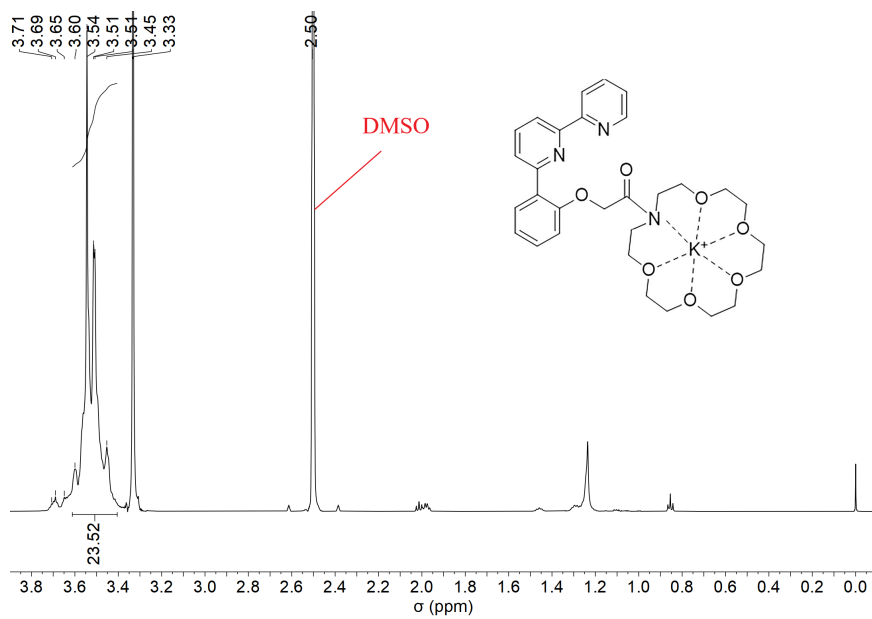

Figure S 30 (a)  $^1\text{H}$  NMR (DMSO, 600 MHz) spectrum of **L<sub>3</sub>** (up). (b)  $^1\text{H}$  NMR (DMSO, 600 MHz) spectrum of **L<sub>3</sub>** with  $K^+$  (down).



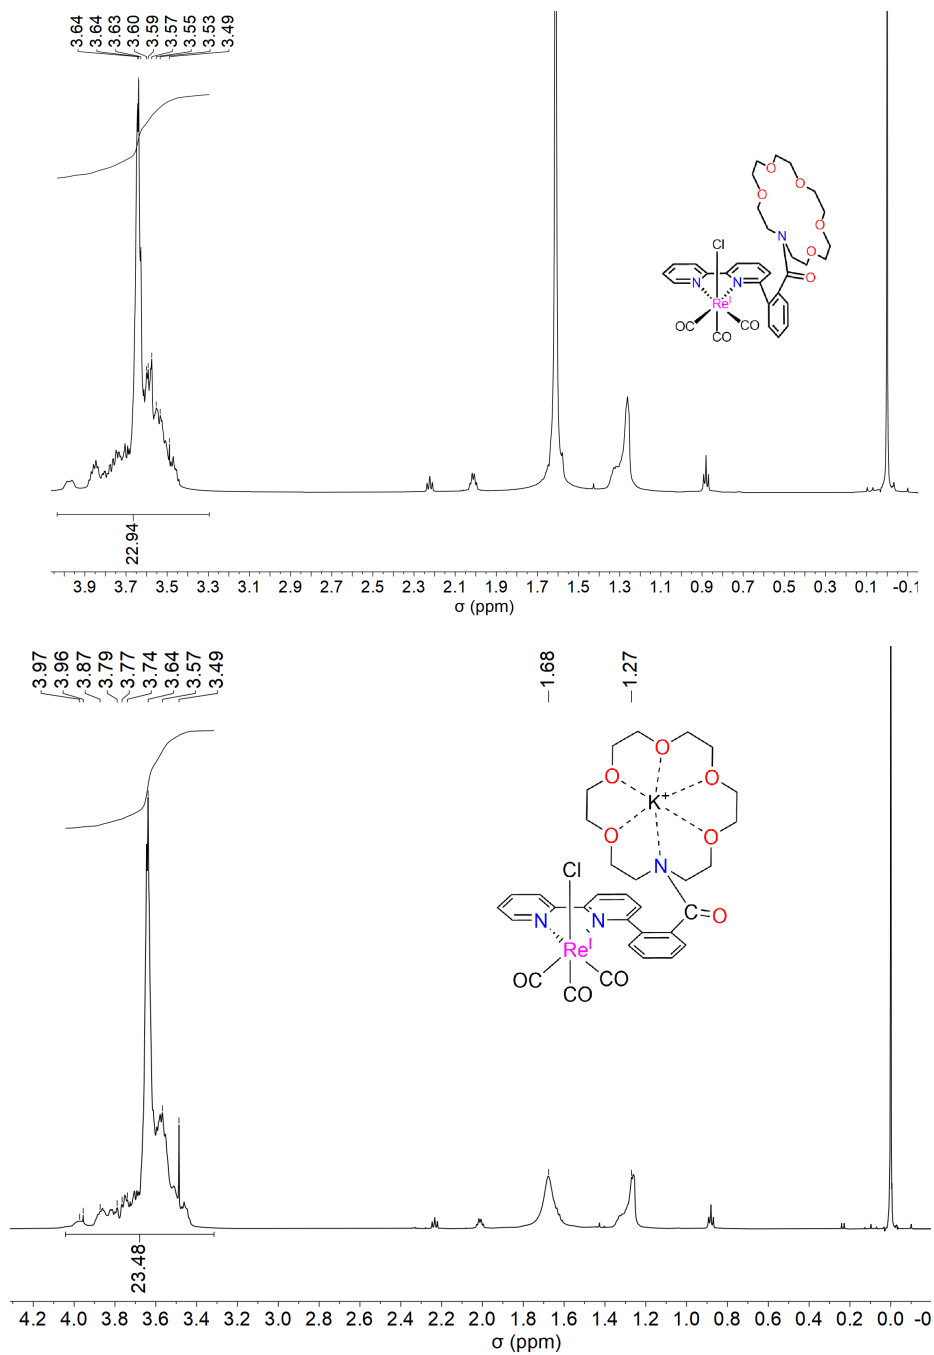

Figure S 31(a)  $^1\text{H}$  NMR (Chloroform, 600 MHz) spectrum of **1** (up). (b)  $^1\text{H}$  NMR (Chloroform, 600 MHz) spectrum of **1** with  $\text{K}^+$  (down).

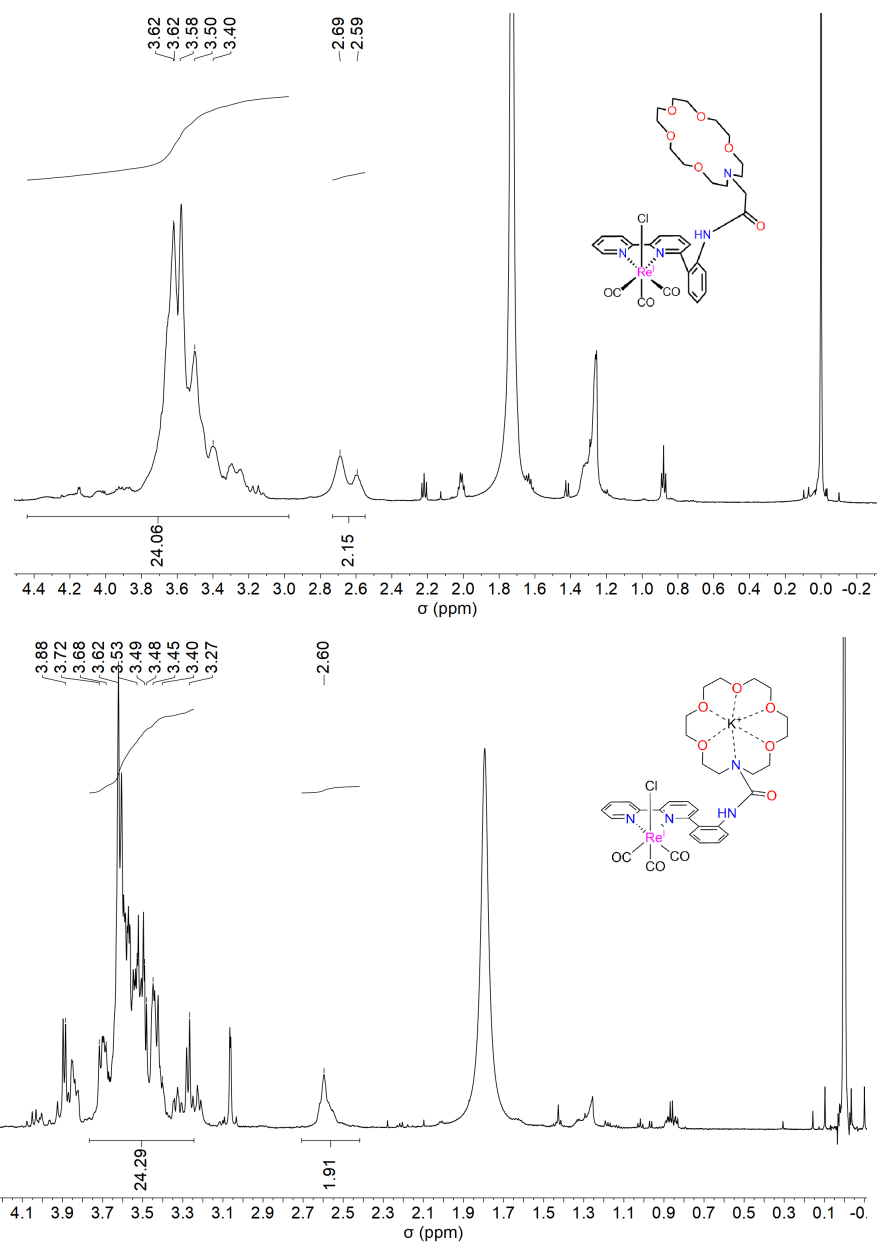

Figure S 32 (a)  $^1\text{H}$  NMR (Chloroform, 600 MHz) spectrum of **2** (up). (b)  $^1\text{H}$  NMR (Chloroform, 600 MHz) spectrum of **2** with  $\text{K}^+$  (down).

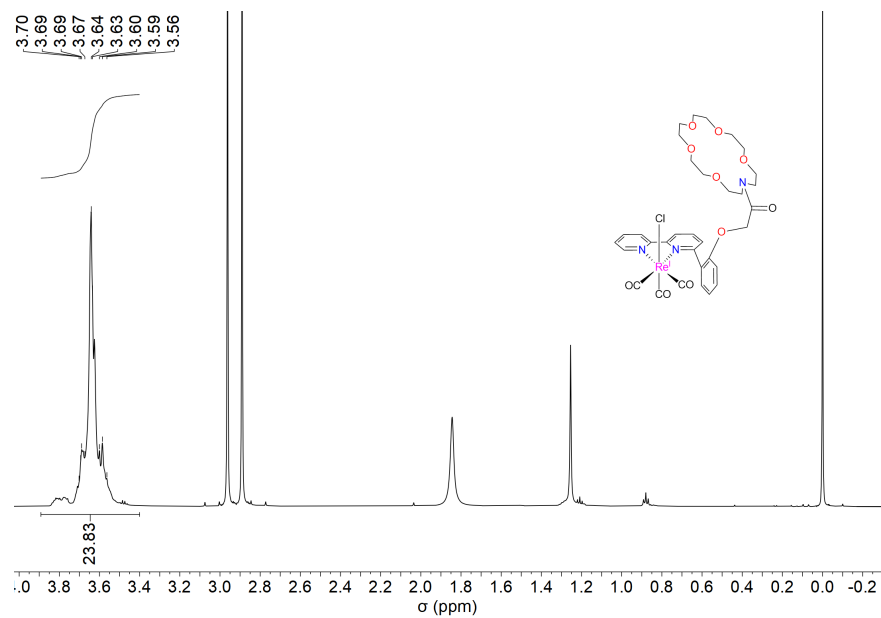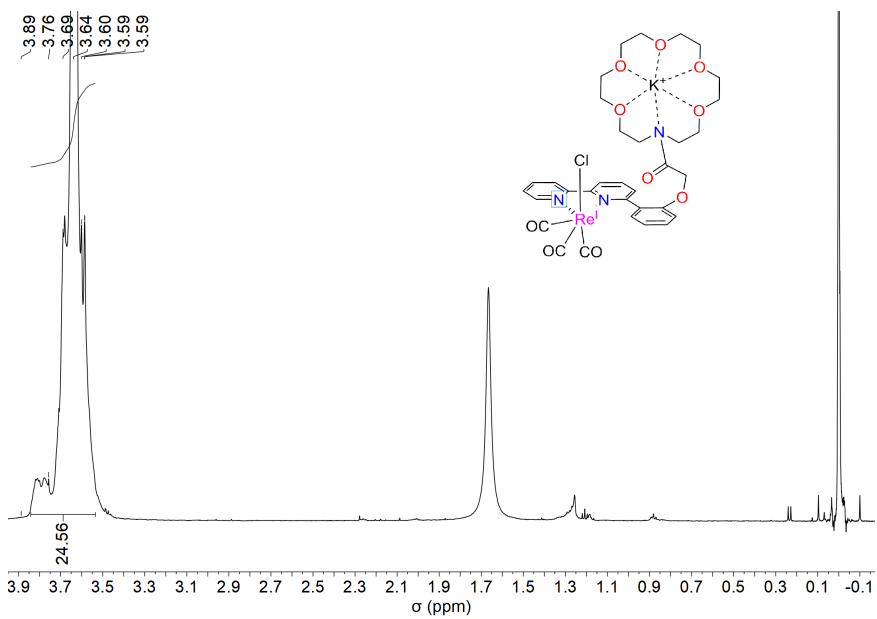

Figure S 33 (a)  $^1\text{H}$  NMR (Chloroform, 600 MHz) spectrum of **3** (up). (b)  $^1\text{H}$  NMR (Chloroform, 600 MHz) spectrum of **3** with  $\text{K}^+$  (down).

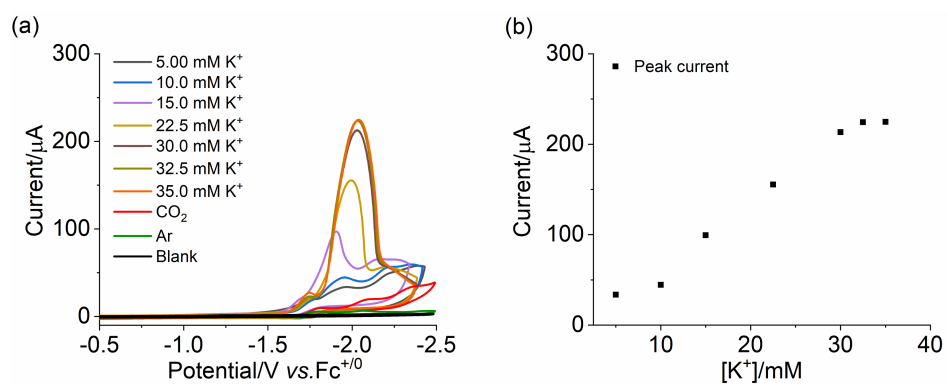

Figure S 34 (a) CVs show 0.5 mM **1** with varied amounts of KPF<sub>6</sub> under CO<sub>2</sub>. (b) The dependence of peak point current ( $i_{cat}$ ) on the concentration of KPF<sub>6</sub>. Voltammograms are taken at a scan rate of 100 mV/s with 0.1 M <sup>n</sup>Bu<sub>4</sub>NPF<sub>6</sub> in MeCN solution. Glassy carbon working electrode, Ag<sup>+</sup>/Ag reference electrode, and Pt wire counter electrode.

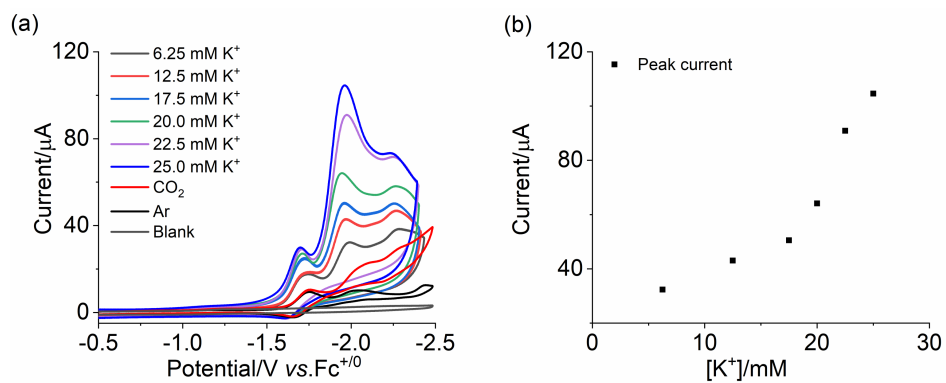

Figure S 35 (a) CVs show 0.5 mM **2** with varied amounts of KPF<sub>6</sub> under CO<sub>2</sub>. (b) The dependence of peak point current ( $i_{cat}$ ) on the concentration of KPF<sub>6</sub>. Voltammograms are taken at a scan rate of 100 mV/s with 0.1 M <sup>n</sup>Bu<sub>4</sub>NPF<sub>6</sub> in MeCN solution. Glassy carbon working electrode, Ag<sup>+</sup>/Ag reference electrode, and Pt wire counter electrode.

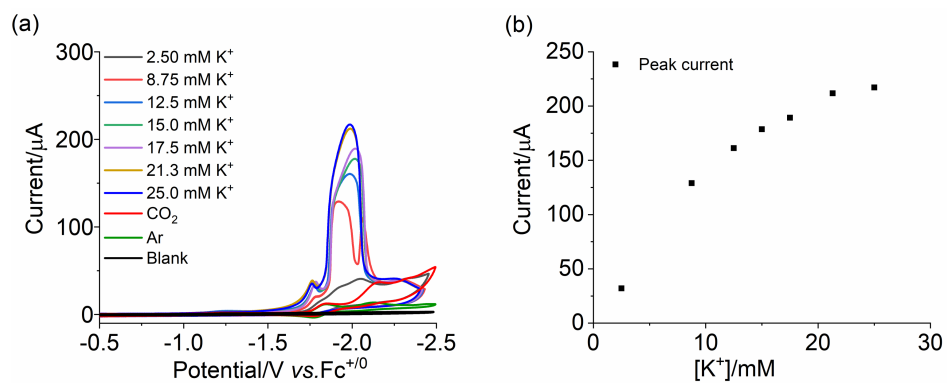

Figure S 36 (a) CVs show 0.5 mM **3** with varied amounts of KPF<sub>6</sub> under CO<sub>2</sub>. (b) The dependence of peak point current ( $i_{cat}$ ) on the concentration of KPF<sub>6</sub>. Voltammograms are taken at a scan rate of 100 mV/s with 0.1 M <sup>n</sup>Bu<sub>4</sub>NPF<sub>6</sub> in MeCN solution. Glassy carbon working electrode, Ag<sup>+</sup>/Ag reference electrode, and Pt wire counter electrode.

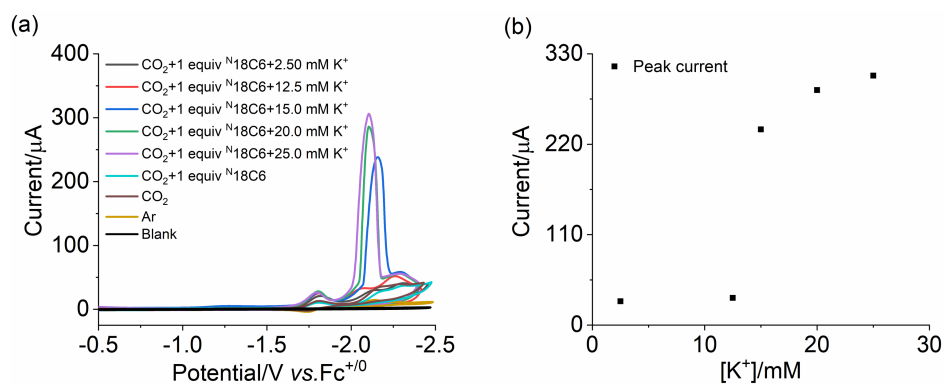

Figure S 37 (a) CVs show 0.5 mM **4** with varied amounts of KPF<sub>6</sub> under CO<sub>2</sub>. (b) The dependence of peak point current (*i<sub>cat</sub>*) on the concentration of KPF<sub>6</sub>. Voltammograms are taken at a scan rate of 100 mV/s with 0.1 M <sup>n</sup>Bu<sub>4</sub>NPF<sub>6</sub> in MeCN solution. Glassy carbon working electrode, Ag<sup>+</sup>/Ag reference electrode, and Pt wire counter electrode.

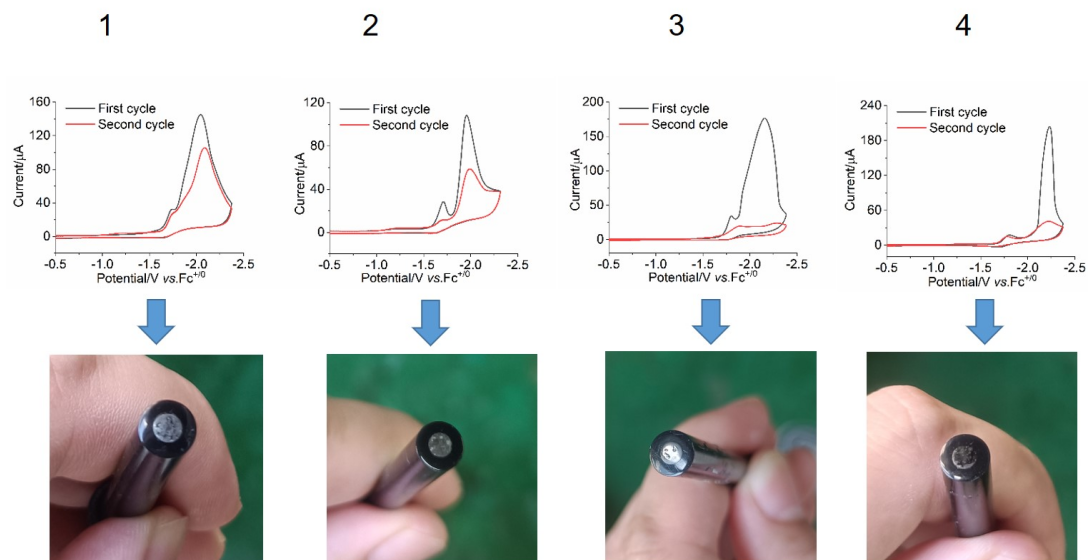

Figure S 38 The first and the second cycle of the CVs of 0.5 mM **1-4** in the presence of 25 mM KPF<sub>6</sub> under CO<sub>2</sub> (up). (b) the photographs of the electrode after two scan cycles (down). Voltammograms are taken at a scan rate of 100 mV/s with 0.1 M *n*-Bu<sub>4</sub>NPF<sub>6</sub> in MeCN solution. Glassy carbon working electrode, Ag<sup>+</sup>/Ag reference electrode, and Pt wire counter electrode.



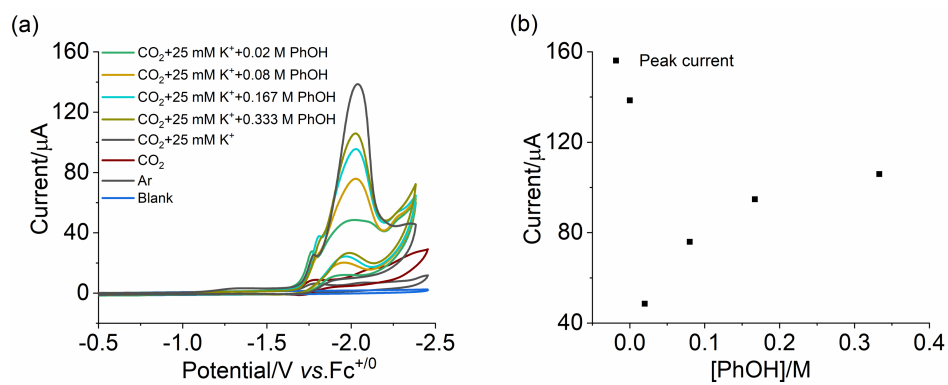

Figure S 39 (a) CVs show 0.5 mM **1** and 25 mM KPF<sub>6</sub> with varied amounts of PhOH under CO<sub>2</sub>. (b) Plot of peak current vs. varied amounts of PhOH for complex **1**. Voltammograms are taken at a scan rate of 100 mV/s with 0.1 M <sup>n</sup>Bu<sub>4</sub>NPF<sub>6</sub> in MeCN solution. Glassy carbon working electrode, Ag<sup>+</sup>/Ag reference electrode, and Pt wire counter electrode.

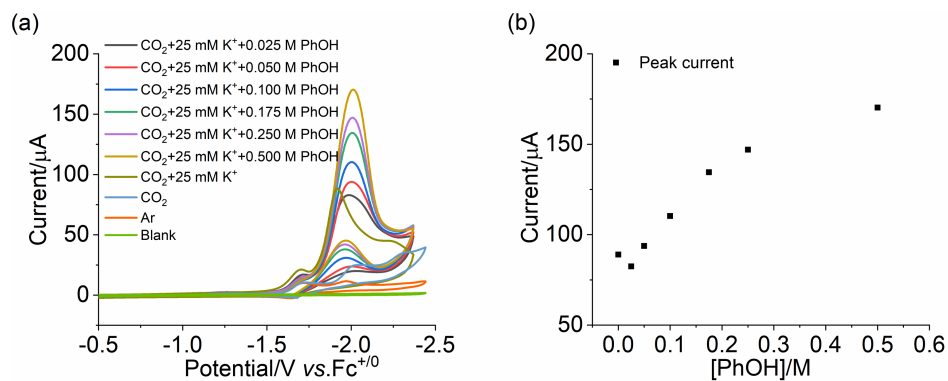

Figure S 40 (a) CVs show 0.5 mM **2** and 25 mM KPF<sub>6</sub> with varied amounts of PhOH under CO<sub>2</sub>. (b) Plot of peak current vs. varied amounts of PhOH for complex **2**. Voltammograms are taken at a scan rate of 100 mV/s with 0.1 M <sup>n</sup>Bu<sub>4</sub>NPF<sub>6</sub> in MeCN solution. Glassy carbon working electrode, Ag<sup>+</sup>/Ag reference electrode, and Pt wire counter electrode.

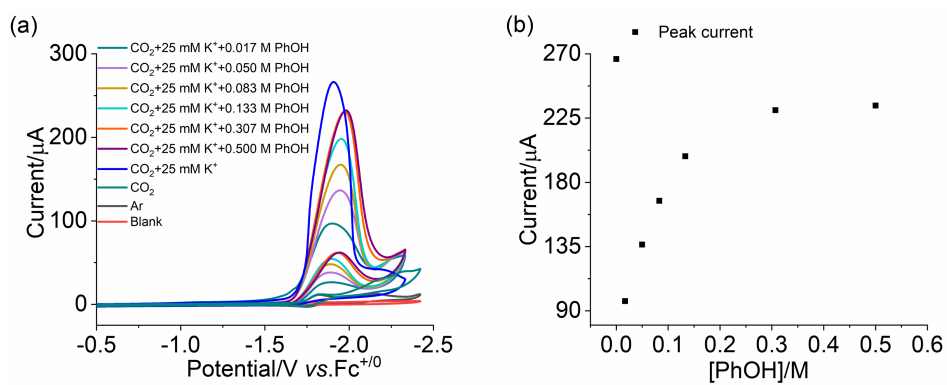

Figure S 41 (a) CVs show 0.5 mM **3** and 25 mM KPF<sub>6</sub> with varied amounts of PhOH under CO<sub>2</sub>. (b) Plot of peak current vs. varied amounts of PhOH for complex **3**. Voltammograms are taken at a scan rate of 100 mV/s with 0.1 M <sup>n</sup>Bu<sub>4</sub>NPF<sub>6</sub> in MeCN solution. Glassy carbon working electrode, Ag<sup>+</sup>/Ag reference electrode, and Pt wire counter electrode.

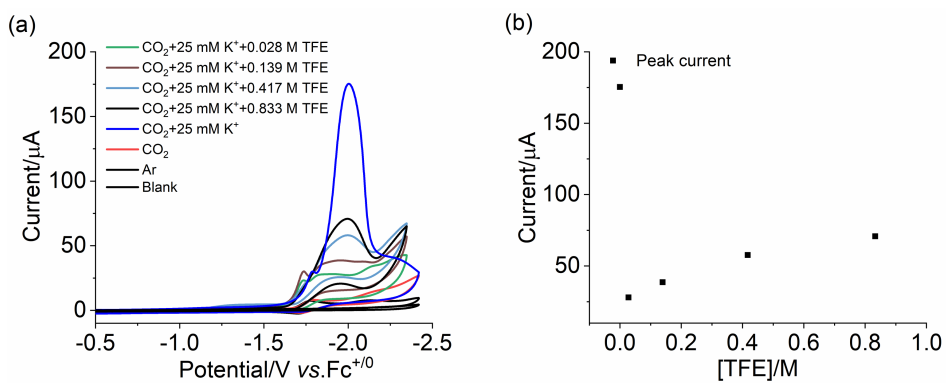

Figure S 42 (a) CVs show 0.5 mM **1** and 25 mM KPF<sub>6</sub> with varied amounts of TFE under CO<sub>2</sub>. (b) Plot of peak current vs. varied amounts of TFE for complex **1**. Voltammograms are taken at a scan rate of 100 mV/s with 0.1 M <sup>n</sup>Bu<sub>4</sub>NPF<sub>6</sub> in MeCN solution. Glassy carbon working electrode, Ag<sup>+</sup>/Ag reference electrode, and Pt wire counter electrode.

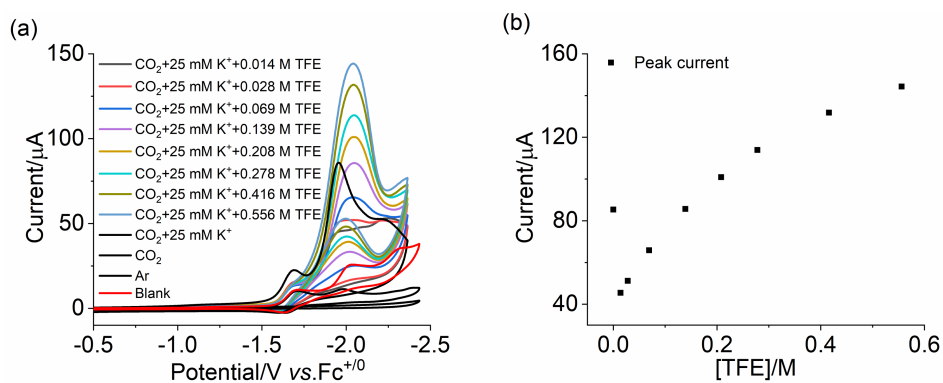

Figure S 43 (a) CVs show 0.5 mM **2** and 25 mM KPF<sub>6</sub> with varied amounts of TFE under CO<sub>2</sub>. (b) Plot of peak current vs. varied amounts of TFE for complex **2**. Voltammograms are taken at a scan rate of 100 mV/s with 0.1 M <sup>n</sup>Bu<sub>4</sub>NPF<sub>6</sub> in MeCN solution. Glassy carbon working electrode, Ag<sup>+</sup>/Ag reference electrode, and Pt wire counter electrode.

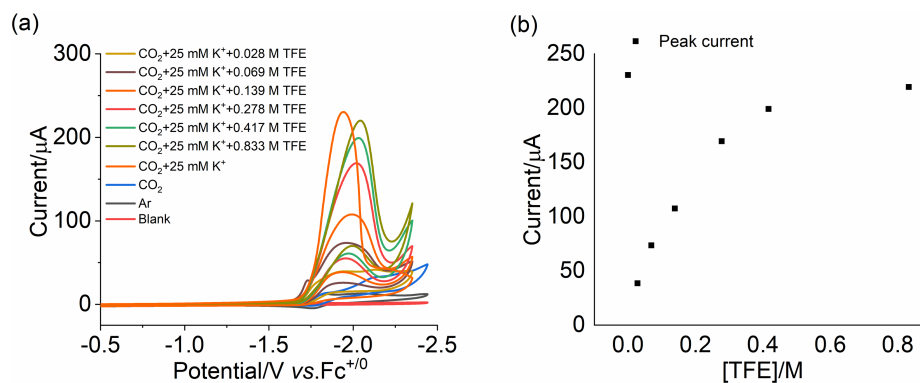

Figure S 44 (a) CVs show 0.5 mM **3** and 25 mM KPF<sub>6</sub> with varied amounts of TFE under CO<sub>2</sub>. (b) Plot of peak current vs. varied amounts of TFE for complex **3**. Voltammograms are taken at a scan rate of 100 mV/s with 0.1 M <sup>n</sup>Bu<sub>4</sub>NPF<sub>6</sub> in MeCN solution. Glassy carbon working electrode, Ag<sup>+</sup>/Ag reference electrode, and Pt wire counter electrode.

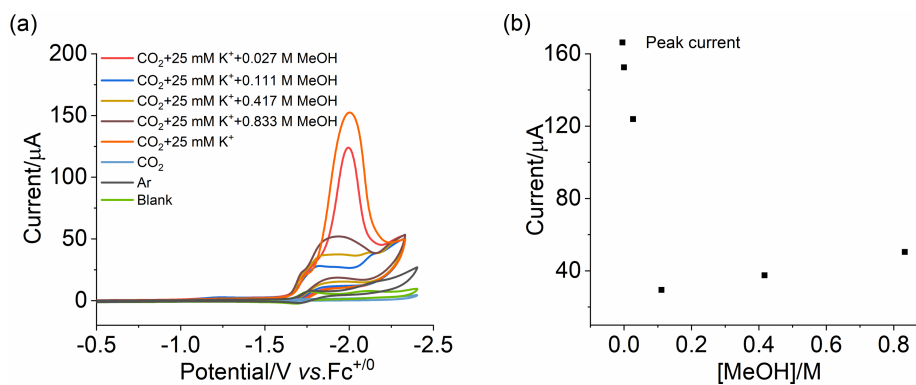

Figure S 45 (a) CVs show 0.5 mM **1** and 25 mM KPF<sub>6</sub> with varied amounts of MeOH under CO<sub>2</sub>. (b) Plot of peak current vs. varied amounts of MeOH for complex **1**. Voltammograms are taken at a scan rate of 100 mV/s with 0.1 M <sup>n</sup>Bu<sub>4</sub>NPF<sub>6</sub> in MeCN solution. Glassy carbon working electrode, Ag<sup>+</sup>/Ag reference electrode, and Pt wire counter electrode.

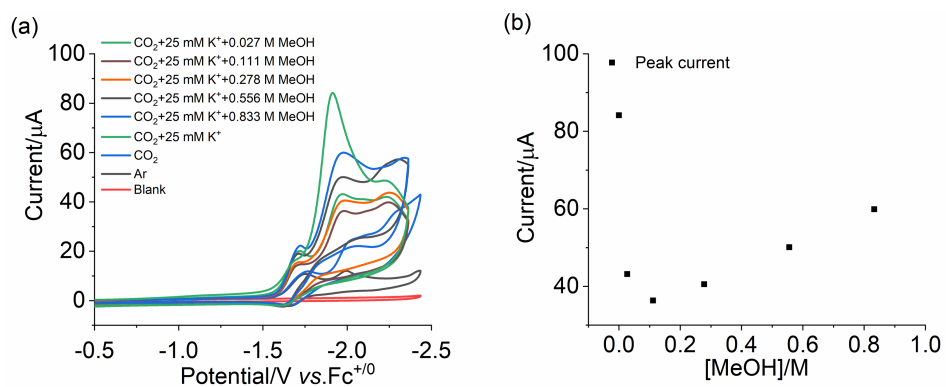

Figure S 46 (a) CVs show 0.5 mM **2** and 25 mM KPF<sub>6</sub> with varied amounts of MeOH under CO<sub>2</sub>. (b) Plot of peak current vs. varied amounts of MeOH for complex **2**. Voltammograms are taken at a scan rate of 100 mV/s with 0.1 M <sup>n</sup>Bu<sub>4</sub>NPF<sub>6</sub> in MeCN solution. Glassy carbon working electrode, Ag<sup>+</sup>/Ag reference electrode, and Pt wire counter electrode.



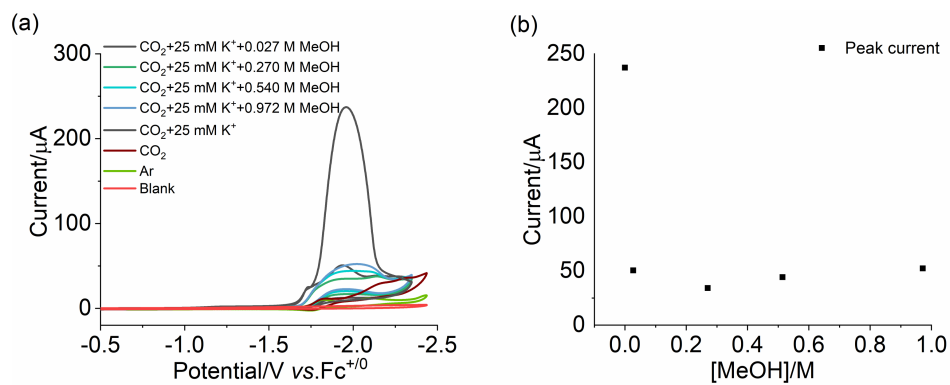

Figure S 47 (a) CVs show 0.5 mM **3** and 25 mM KPF<sub>6</sub> with varied amounts of MeOH under CO<sub>2</sub>. (b) Plot of peak current vs. varied amounts of MeOH for complex **3**. Voltammograms are taken at a scan rate of 100 mV/s with 0.1 M <sup>n</sup>Bu<sub>4</sub>NPF<sub>6</sub> in MeCN solution. Glassy carbon working electrode, Ag<sup>+</sup>/Ag reference electrode, and Pt wire counter electrode.

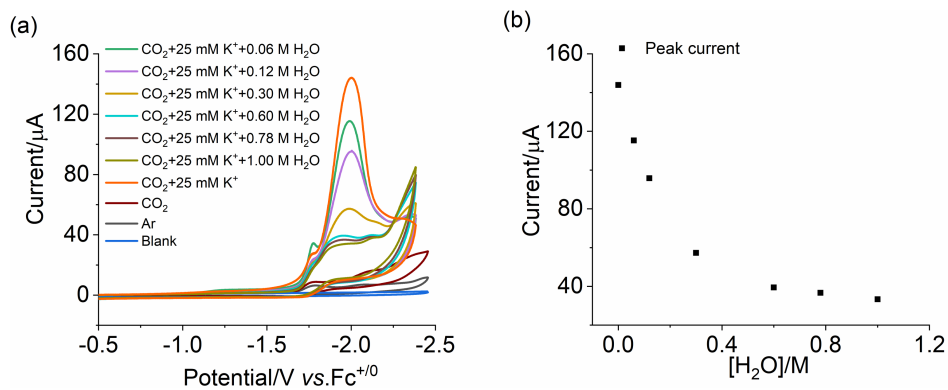

Figure S 48 (a) CVs show 0.5 mM **1** and 25 mM KPF<sub>6</sub> with varied amounts of H<sub>2</sub>O under CO<sub>2</sub>. (b) Plot of peak current vs. varied amounts of H<sub>2</sub>O for complex **1**. Voltammograms are taken at a scan rate of 100 mV/s with 0.1 M <sup>n</sup>Bu<sub>4</sub>NPF<sub>6</sub> in MeCN solution. Glassy carbon working electrode, Ag<sup>+</sup>/Ag reference electrode, and Pt wire counter electrode.

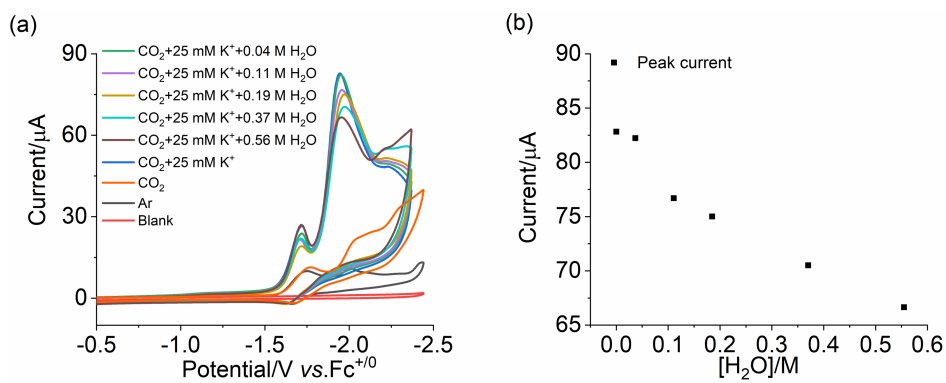

Figure S 49 (a) CVs show 0.5 mM **2** and 25 mM KPF<sub>6</sub> with varied amounts of H<sub>2</sub>O under CO<sub>2</sub>. (b) Plot of peak current vs. varied amounts of H<sub>2</sub>O for complex **2**. Voltammograms are taken at a scan rate of 100 mV/s with 0.1 M <sup>n</sup>Bu<sub>4</sub>NPF<sub>6</sub> in MeCN solution. Glassy carbon working electrode, Ag<sup>+</sup>/Ag reference electrode, and Pt wire counter electrode.

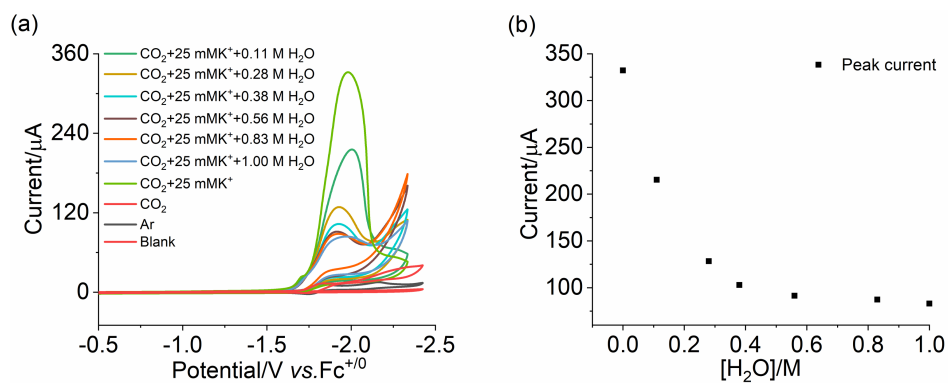

Figure S 50 (a) CVs show 0.5 mM **3** and 25 mM KPF<sub>6</sub> with varied amounts of H<sub>2</sub>O under CO<sub>2</sub>. (b) Plot of peak current vs. varied amounts of H<sub>2</sub>O for complex **3**. Voltammograms are taken at a scan rate of 100 mV/s with 0.1 M <sup>n</sup>Bu<sub>4</sub>NPF<sub>6</sub> in MeCN solution. Glassy carbon working electrode, Ag<sup>+</sup>/Ag reference electrode, and Pt wire counter electrode.

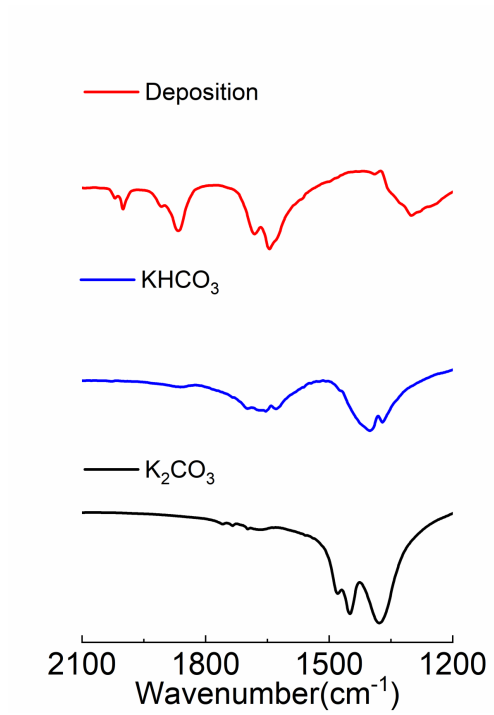

Figure S 51 IR-SEC of Deposition  $\text{KHCO}_3$  and  $\text{K}_2\text{CO}_3$

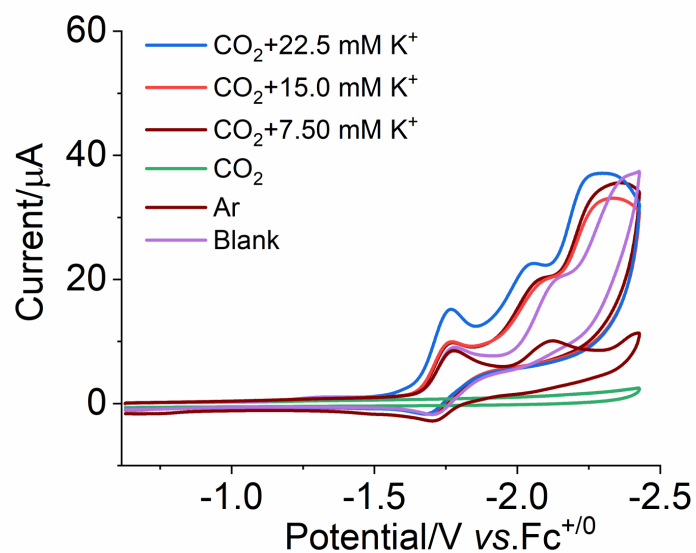

Figure S 52 CVs show 0.5 mM **1** with varied amounts of KPF<sub>6</sub> under CO<sub>2</sub>. Voltammograms are taken at a scan rate of 100 mV/s with 0.1 M <sup>n</sup>Bu<sub>4</sub>NPF<sub>6</sub> in MeCN : DMF (4 : 1) solution. Glassy carbon working electrode, Ag<sup>+</sup>/Ag reference electrode, and Pt wire counter electrode.

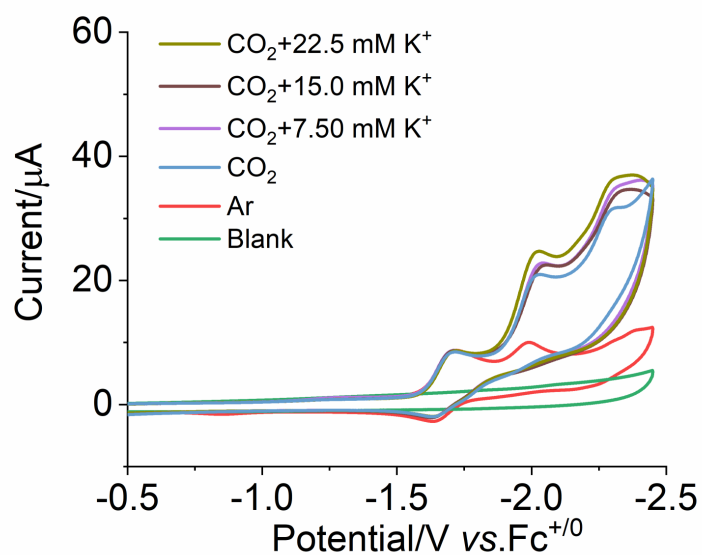

Figure S 53 CVs show 0.5 mM **2** with varied amounts of KPF<sub>6</sub> under CO<sub>2</sub>. Voltammograms are taken at a scan rate of 100 mV/s with 0.1 M <sup>n</sup>Bu<sub>4</sub>NPF<sub>6</sub> in MeCN : DMF (4 : 1) solution. Glassy carbon working electrode, Ag<sup>+</sup>/Ag reference electrode, and Pt wire counter electrode.

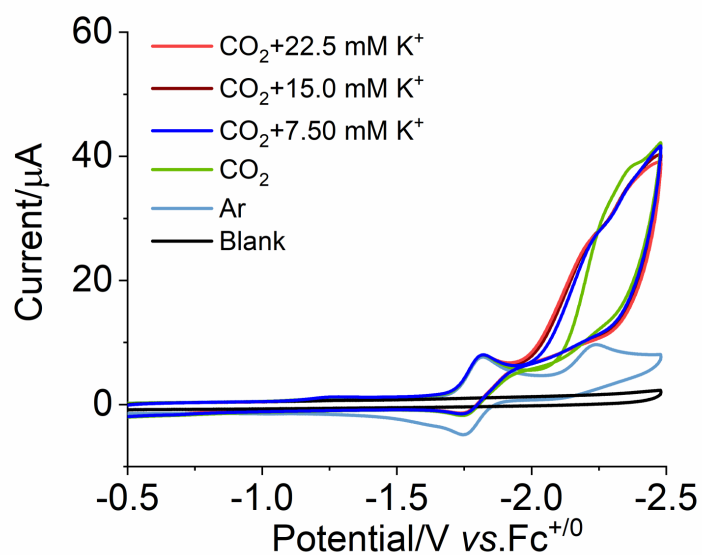

Figure S 54 CVs show 0.5 mM **3** with varied amounts of KPF<sub>6</sub> under CO<sub>2</sub>. Voltammograms are taken at a scan rate of 100 mV/s with 0.1 M <sup>n</sup>Bu<sub>4</sub>NPF<sub>6</sub> in MeCN : DMF (4 : 1) solution. Glassy carbon working electrode, Ag<sup>+</sup>/Ag reference electrode, and Pt wire counter electrode.



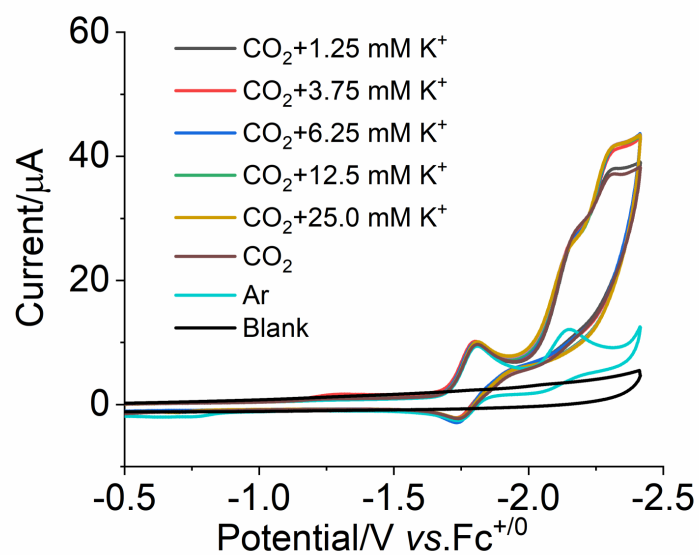

Figure S 55 CVs show 0.5 mM **4** with varied amounts of  $\text{KPF}_6$  under  $\text{CO}_2$ . Voltammograms are taken at a scan rate of 100 mV/s with 0.1 M  $n\text{-Bu}_4\text{NPF}_6$  in MeCN : DMF (4 : 1) solution. Glassy carbon working electrode,  $\text{Ag}^+/\text{Ag}$  reference electrode, and Pt wire counter electrode.

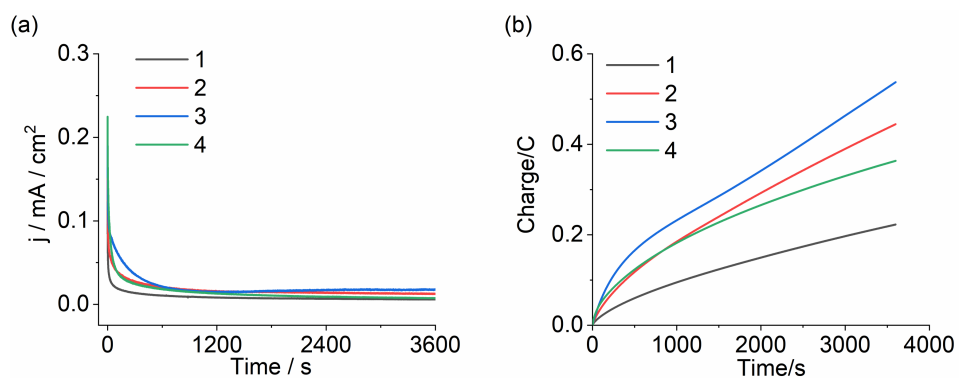

Figure S 56 (a) Controlled potential electrolysis at  $-2.25$  vs.  $\text{Fc}^{+/0}$  in the presence of  $0.5$  mM **1-4** and  $25$  mM  $\text{KPF}_6$  under  $\text{CO}_2$ . (b) The charge integration after electrolysis for **1-4**. Voltammograms are taken at a scan rate of  $100$  mV/s with  $0.1$  M  $n\text{Bu}_4\text{NPF}_6$  in MeCN : DMF (4 : 1) solution. Glassy carbon working electrode,  $\text{Ag}^+/\text{Ag}$  reference electrode, and Pt wire counter electrode.

Table S 6 The products selectivity of **1-4** in the same condition.

| Complex ( $0.5$ mM)                 | <b>1</b>       | <b>2</b>       | <b>3</b>       | <b>4</b>       | Blank          |
|-------------------------------------|----------------|----------------|----------------|----------------|----------------|
| Potassium source ( $25$ mM)         | $\text{KPF}_6$ | $\text{KPF}_6$ | $\text{KPF}_6$ | $\text{KPF}_6$ | $\text{KPF}_6$ |
| Potential / V vs. $\text{Fc}^{+/0}$ | $-2.25$        | $-2.25$        | $-2.25$        | $-2.25$        | $-2.25$        |
| Q / C                               | 0.22           | 0.44           | 0.54           | 0.36           | 0.14           |
| FE(CO) / (%)                        | 39             | 77             | 45             | 70             | 0              |
| $\text{H}_2$                        | 0              | 0              | 0              | 0              | /              |
| TON                                 | 0.04           | 0.3            | 0.23           | 0.2            | /              |

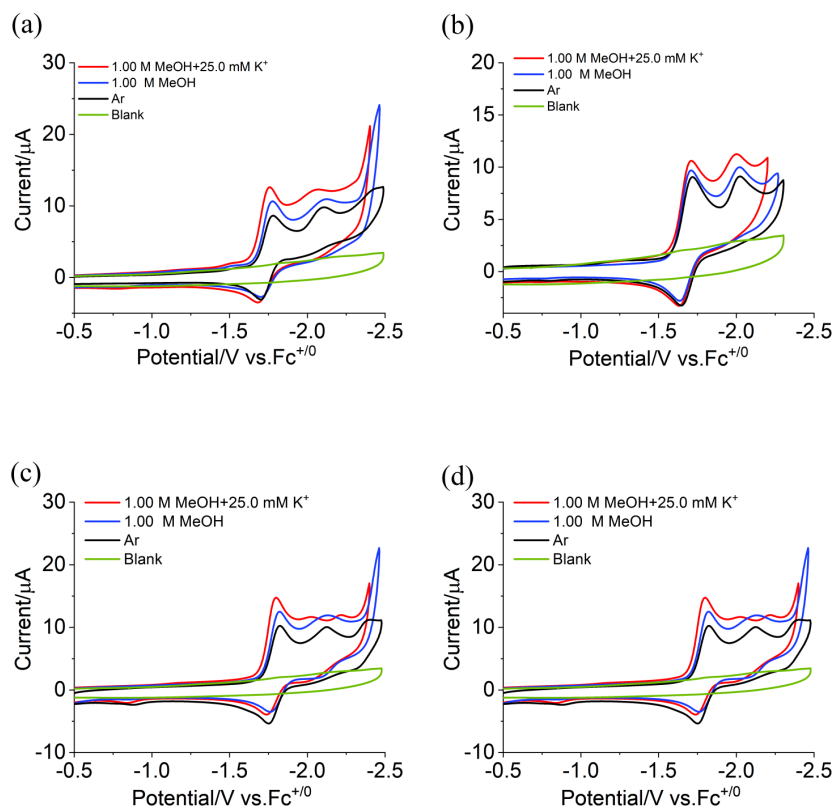

Figure S 57 (a) CVs show 0.5 mM **1** in the presence of 1 M methanol, upon addition of  $K^+$  under Ar. (b) CVs show 0.5 mM **2** in the presence of 1 M methanol, upon addition of  $K^+$  under Ar. (c) CVs show 0.5 mM **3** in the presence of 1 M methanol, upon addition of  $K^+$  under Ar. (d) CVs show 0.5 mM **4** in the presence of 1 M methanol, upon addition of  $K^+$  under Ar. Voltammograms are taken at a scan rate of 100 mV/s with 0.1 M  $nBu_4NPF_6$  in MeCN solution. Glassy carbon working electrode,  $Ag^+/Ag$  reference electrode, and Pt wire counter electrode.
